# Supplementary material for: RIBOsensor for FRET-based, real-time ribose measurements in live cells
Source: Royal Society of Chemistry journal article supplement (doi:10.1039/d5sc00244c), 2025-01-01
Supplement: d5sc00244c2.xlsx [file d5sc00244c2.xlsx]

## Sheet: MD simulation data
distance of each amino acid from N-terminus								distance of each amino acid from C-terminus
	amino acid number	No Ribose		amino acid number	With Ribose				amino acid number	No Ribose		amino acid number	With Ribose
residue (D)	1	3.84749		1	3.84324			residue (K)	0	46.4763		0	46.7239
residue (T)	2	6.72597		2	6.66206			residue (D)	1	45.6202		1	46.0335
residue	3	9.77788		3	9.67517			residue	2	43.933		2	44.4213
residue	4	12.9921		4	12.8766			residue	3	40.9441		3	41.3862
residue	5	16.1319		5	15.9029			residue	4	40.2225		4	40.6672
residue	6	19.473		6	19.292			residue	5	37.0769		5	37.4433
residue	7	22.18		7	21.9343			residue	6	37.545		6	37.7744
residue	8	25.9281		8	25.6995			residue	7	34.4679		7	34.6354
residue	9	26.3703		9	26.6744			residue	8	34.1903		8	34.271
residue	10	24.674		10	25.5808			residue	9	33.3917		9	32.987
residue	11	28.1334		11	29.2824			residue	10	32.3695		10	31.6153
residue	12	29.2759		12	29.7604			residue	11	31.4415		11	30.279
residue	13	28.3677		13	28.6579			residue	12	27.856		12	26.908
residue	14	27.5712		14	27.5898			residue	13	25.2795		13	24.5217
residue	15	24.617		15	24.7822			residue	14	24.2688		14	23.9436
residue	16	23.4742		16	23.7187			residue	15	27.8918		15	27.6845
residue	17	23.6721		17	23.7169			residue	16	28.2964		16	28.0302
residue	18	21.7166		18	21.7165			residue	17	25.4799		17	25.4165
residue	19	18.9341		19	19.0681			residue	18	27.1995		18	27.2166
residue	20	19.0807		20	19.0264			residue	19	30.4569		19	30.5165
residue	21	19.085		21	18.9195			residue	20	29.1723		20	29.4314
residue	22	16.0017		22	15.9267			residue	21	27.8459		21	28.2027
residue	23	14.229		23	14.1174			residue	22	31.2398		22	31.5483
residue	24	15.3291		24	15.2057			residue	23	33.1118		23	33.4569
residue	25	14.0384		25	14.03			residue	24	31.6472		24	31.9637
residue	26	10.5727		26	10.5252			residue	25	32.6626		25	32.8892
residue	27	10.5555		27	10.3959			residue	26	36.0081		26	36.2926
residue	28	12.1323		28	12.0976			residue	27	36.789		27	37.0961
residue	29	9.9157		29	9.93686			residue	28	35.9676		28	36.1964
residue	30	6.69848		30	6.7075			residue	29	38.1682		29	38.4412
residue	31	5.74978		31	5.61554			residue	30	40.8871		30	41.1797
residue	32	6.6179		32	6.33213			residue	31	40.9264		31	41.3082
residue	33	10.2034		33	9.94041			residue	32	41.4831		32	41.8981
residue	34	12.5178		34	12.2245			residue	33	38.9629		33	39.3822
residue	35	16.1411		35	15.8294			residue	34	40.2531		34	40.6996
residue	36	19.0843		36	18.7767			residue	35	37.7923		35	38.1753
residue	37	22.7041		37	22.3653			residue	36	39.1033		36	39.4749
residue	38	25.2582		38	25.0876			residue	37	37.4182		37	37.5997
residue	39	28.3249		39	28.0153			residue	38	38.492		38	38.5936
residue	40	30.3148		40	30.2681			residue	39	37.4781		39	36.9993
residue	41	30.8167		41	30.5208			residue	40	36.3096		40	36.5652
residue	42	30.3013		42	29.9867			residue	41	40.0116		41	40.3405
residue	43	30.1542		43	29.6892			residue	42	41.7919		42	42.1274
residue	44	27.3001		44	26.8393			residue	43	44.9988		43	45.3281
residue	45	25.4832		45	25.1228			residue	44	43.3076		44	43.573
residue	46	25.925		46	25.479			residue	45	41.5535		45	41.8035
residue	47	24.8675		47	24.3567			residue	46	45.0218		46	45.2666
residue	48	21.5677		48	21.1			residue	47	46.5005		47	46.74
residue	49	20.8978		49	20.3595			residue	48	43.9708		48	44.1598
residue	50	22.117		50	21.4218			residue	49	44.9264		49	45.2481
residue	51	19.8374		51	19.0684			residue	50	48.5966		50	48.8884
residue	52	16.7736		52	16.0446			residue	51	48.3096		51	48.4406
residue	53	18.1433		53	17.2177			residue	52	46.5864		52	46.8519
residue	54	18.3401		54	17.3021			residue	53	49.3222		53	49.8345
residue	55	14.8913		55	13.8949			residue	54	51.9494		54	52.1763
residue	56	13.3721		56	12.4352			residue	55	50.2688		55	50.1023
residue	57	11.5767		57	11.1438			residue	56	49.6276		56	49.9908
residue	58	11.0195		58	10.7282			residue	57	46.4258		57	46.6158
residue	59	13.1735		59	12.9655			residue	58	45.8208		58	46.1335
residue	60	15.782		60	15.5709			residue	59	42.584		59	42.9366
residue	61	17.3763		61	17.0914			residue	60	40.7401		60	41.1454
residue	62	20.7823		62	20.444			residue	61	36.9938		61	37.3869
residue	63	23.7109		63	23.3546			residue	62	36.5299		62	36.922
residue	64	26.674		64	26.4238			residue	63	33.7306		63	34.0478
residue	65	29.0117		65	28.918			residue	64	35.5707		64	35.7247
residue	66	31.9725		66	31.6621			residue	65	35.8728		65	35.9066
residue	67	32.8244		67	31.3133			residue	66	36.5365		66	36.8929
residue	68	34.6739		68	33.8697			residue	67	36.3425		67	36.878
residue	69	32.3142		69	32.2559			residue	68	39.8374		68	40.0118
residue	70	29.3967		70	28.4699			residue	69	41.349		69	42.0494
residue	71	29.1826		71	28.9395			residue	70	39.7516		70	41.2193
residue	72	28.8287		72	28.7663			residue	71	42.4081		71	43.7854
residue	73	25.157		73	25.2408			residue	72	44.9992		72	46.6429
residue	74	24.4932		74	24.2707			residue	73	43.7494		73	44.9541
residue	75	26.5049		75	26.0015			residue	74	43.2779		74	44.1569
residue	76	24.5472		76	24.0705			residue	75	46.8436		75	47.8213
residue	77	21.2812		77	20.7699			residue	76	48.1023		76	49.0518
residue	78	23.2013		78	22.5637			residue	77	46.4399		77	47.1219
residue	79	24.403		79	23.6982			residue	78	48.0526		78	48.5849
residue	80	20.9865		80	20.2495			residue	79	51.4064		79	52.0775
residue	81	19.8637		81	19.1749			residue	80	51.0954		80	51.6562
residue	82	17.3301		82	16.8377			residue	81	50.1102		81	50.5217
residue	83	17.7571		83	17.6282			residue	82	46.7194		82	47.0267
residue	84	19.3708		84	19.3789			residue	83	43.9537		83	44.2942
residue	85	19.9342		85	19.772			residue	84	40.9888		84	41.4222
residue	86	22.8698		86	22.6138			residue	85	37.2955		85	37.7489
residue	87	23.2219		87	22.8487			residue	86	34.9778		86	35.3266
residue	88	26.8525		88	26.3939			residue	87	31.5311		87	31.8633
residue	89	28.64		89	28.211			residue	88	28.9706		88	29.0916
residue	90	28.7605		90	28.4127			residue	89	31.6054		89	31.6611
residue	91	28.9372		91	28.5511			residue	90	34.4731		90	34.6762
residue	92	32.2309		92	31.7912			residue	91	38.17		91	38.3587
residue	93	31.2507		93	30.8696			residue	92	40.1525		92	40.3451
residue	94	28.4264		94	27.9905			residue	93	43.4565		93	43.7227
residue	95	26.2837		95	25.9257			residue	94	44.9026		94	45.2277
residue	96	24.2081		96	24.0249			residue	95	44.1808		95	44.7081
residue	97	22.0832		97	22.2029			residue	96	40.8361		96	41.2942
residue	98	22.7995		98	22.896			residue	97	40.554		97	40.9225
residue	99	24.4769		99	24.4959			residue	98	36.8149		98	37.1651
residue	100	24.0054		100	24.0607			residue	99	33.6978		99	33.9893
residue	101	27.197		101	27.0028			residue	100	30.3538		100	30.6145
residue	102	30.1004		102	29.9701			residue	101	27.4134		101	27.5984
residue	103	33.3718		103	33.0244			residue	102	24.103		102	24.2061
residue	104	35.6869		104	35.0143			residue	103	24.508		103	24.4232
residue	105	38.5108		105	38.1088			residue	104	23.7559		104	24.2588
residue	106	38.3079		106	38.3794			residue	105	24.8846		105	25.2641
residue	107	38.2102		107	37.8745			residue	106	22.3272		106	22.4838
residue	108	41.3585		108	40.77			residue	107	19.6104		107	19.9554
residue	109	42.9873		109	42.8713			residue	108	20.8101		108	21.2813
residue	110	42.1554		110	42.179			residue	109	20.778		109	21.0078
residue	111	43.5351		111	43.1841			residue	110	17.1856		110	17.3246
residue	112	46.5942		112	46.3272			residue	111	16.2841		111	16.7773
residue	113	47.1241		113	47.1948			residue	112	18.6274		112	19.0198
residue	114	47.2168		114	47.0341			residue	113	17.2928		113	17.4555
residue	115	49.8065		115	49.3299			residue	114	13.8551		114	14.0601
residue	116	51.7911		116	51.6633			residue	115	15.9962		115	16.2489
residue	117	51.7816		117	51.8741			residue	116	17.9853		116	18.1059
residue	118	52.9493		118	52.6357			residue	117	15.2008		117	15.1967
residue	119	55.1828		119	54.6281			residue	118	13.9998		118	14.0484
residue	120	56.1917		120	56.0158			residue	119	17.4564		119	17.5382
residue	121	56.2275		121	56.2325			residue	120	19.7072		120	19.7623
residue	122	57.8327		122	57.4267			residue	121	22.6831		121	22.8348
residue	123	56.6912		123	55.8546			residue	122	25.2662		122	25.4075
residue	124	57.0805		124	55.6907			residue	123	22.9828		123	23.131
residue	125	53.667		125	52.0531			residue	124	24.584		124	24.7676
residue	126	52.2569		126	50.0753			residue	125	23.3282		125	23.5128
residue	127	48.8813		127	46.5851			residue	126	24.4827		126	24.6376
residue	128	46.9203		128	44.1734			residue	127	24.736		127	24.8394
residue	129	44.4329		129	41.5473			residue	128	25.189		128	25.2898
residue	130	41.2926		130	38.0838			residue	129	27.1463		129	27.1614
residue	131	40.522		131	36.9692			residue	130	27.8799		130	27.9342
residue	132	41.7143		132	38.9227			residue	131	31.3349		131	31.4617
residue	133	39.1627		133	36.4719			residue	132	33.4144		132	33.4528
residue	134	36.3554		134	33.8413			residue	133	35.4078		133	35.8246
residue	135	35.4013		135	33.6216			residue	134	32.5721		134	33.1638
residue	136	35.1905		136	33.4016			residue	135	31.8079		135	32.2034
residue	137	38.7717		137	36.8614			residue	136	28.0828		136	28.5121
residue	138	39.8821		138	38.2926			residue	137	28.0615		137	28.505
residue	139	38.2071		139	37.173			residue	138	30.2028		138	30.6471
residue	140	39.5214		140	38.3524			residue	139	28.081		139	28.599
residue	141	42.9223		141	41.6213			residue	140	24.7812		140	25.2443
residue	142	42.8145		142	42.0539			residue	141	26.74		141	27.2038
residue	143	42.0663		143	41.5518			residue	142	28.2252		142	28.7224
residue	144	45.0049		144	44.0889			residue	143	24.8741		143	25.399
residue	145	47.1759		145	46.4621			residue	144	23.8096		144	24.0782
residue	146	46.5367		146	46.55			residue	145	27.2606		145	27.4964
residue	147	47.6512		147	47.5413			residue	146	26.7106		146	27.0827
residue	148	50.6581		148	50.1017			residue	147	23.5464		147	23.8567
residue	149	51.6853		149	51.6465			residue	148	25.6313		148	25.7837
residue	150	51.141		150	51.6082			residue	149	28.2784		149	28.5148
residue	151	52.9096		151	53.06			residue	150	26.0611		150	26.3762
residue	152	55.4191		152	55.2769			residue	151	24.057		151	24.2794
residue	153	54.7089		153	54.013			residue	152	26.9984		152	27.1997
residue	154	56.8886		154	55.6615			residue	153	25.4796		153	25.7062
residue	155	54.7186		155	53.0302			residue	154	27.785		154	28.0118
residue	156	56.8622		156	54.7083			residue	155	27.7748		155	27.9793
residue	157	54.5154		157	51.9304			residue	156	29.0148		156	29.2353
residue	158	51.0587		158	48.3905			residue	157	29.5558		157	29.7499
residue	159	49.9749		159	46.6734			residue	158	29.2321		158	29.3725
residue	160	46.9448		160	43.2048			residue	159	30.1902		159	30.4344
residue	161	46.0691		161	42.2321			residue	160	30.6216		160	30.7079
residue	162	42.828		162	38.7237			residue	161	28.9944		161	29.2811
residue	163	40.5654		163	36.7532			residue	162	29.9588		162	30.2391
residue	164	42.5263		164	38.2179			residue	163	26.7622		163	26.9936
residue	165	44.5536		165	40.4059			residue	164	27.1779		164	27.4369
residue	166	47.3308		166	42.8051			residue	165	25.1725		165	25.4389
residue	167	47.6807		167	43.2855			residue	166	28.3572		166	28.5763
residue	168	47.6519		168	43.7972			residue	167	29.4733		167	29.7148
residue	169	50.3402		169	46.372			residue	168	26.0931		168	26.3071
residue	170	52.4553		170	48.1793			residue	169	26.3246		169	26.4627
residue	171	52.1623		171	48.1774			residue	170	29.9541		170	30.085
residue	172	52.9271		172	49.3327			residue	171	29.5166		171	29.6778
residue	173	55.9344		173	52.1279			residue	172	26.5957		172	26.7011
residue	174	57.3565		174	53.3963			residue	173	28.6103		173	28.6386
residue	175	56.7628		175	53.2549			residue	174	31.5306		174	31.6351
residue	176	58.2376		176	54.9253			residue	175	29.5383		175	29.7357
residue	177	61.4144		177	57.7231			residue	176	27.8689		176	27.9744
residue	178	61.7422		178	58.2897			residue	177	31.3653		177	31.464
residue	179	60.7346		179	57.9414			residue	178	32.6046		178	32.8861
residue	180	61.7138		180	59.0932			residue	179	29.8226		179	30.186
residue	181	61.4601		181	59.3486			residue	180	28.0042		180	28.3194
residue	182	57.7137		182	55.654			residue	181	26.7115		181	27.054
residue	183	56.4235		183	54.8941			residue	182	24.0038		182	24.1998
residue	184	52.6765		184	51.11			residue	183	20.7155		183	20.8896
residue	185	50.2168		185	48.1802			residue	184	19.0131		184	19.1505
residue	186	46.8617		186	44.9135			residue	185	19.9219		185	20.0401
residue	187	44.4074		187	42.0752			residue	186	19.864		186	19.9628
residue	188	41.1355		188	38.7933			residue	187	20.9322		187	20.996
residue	189	39.411		189	36.7057			residue	188	22.2792		188	22.2962
residue	190	40.3111		190	37.615			residue	189	21.0359		189	21.1589
residue	191	41.3353		191	37.983			residue	190	18.6347		190	18.8076
residue	192	44.0631		192	40.7743			residue	191	21.6893		191	21.8853
residue	193	45.0466		193	42.2844			residue	192	22.6363		192	22.7565
residue	194	45.4328		194	42.4206			residue	193	19.1529		193	19.2292
residue	195	47.4673		195	43.9772			residue	194	19.1619		194	19.2801
residue	196	49.6014		196	46.4737			residue	195	22.6827		195	22.8135
residue	197	50.0491		197	47.3071			residue	196	21.8347		196	21.9079
residue	198	51.2172		198	48.043			residue	197	19.1008		197	19.2749
residue	199	53.7497		199	50.3352			residue	198	21.8295		198	22.1496
residue	200	55.0168		200	52.1379			residue	199	24.1999		199	24.4566
residue	201	55.2638		201	52.4945			residue	200	21.9507		200	22.2137
residue	202	57.1428		202	53.8517			residue	201	21.3795		201	21.8015
residue	203	59.5559		203	56.3597			residue	202	25.1374		202	25.5747
residue	204	59.9801		204	57.3486			residue	203	25.9703		203	26.3642
residue	205	58.6731		205	56.3165			residue	204	23.6583		204	24.1672
residue	206	57.1094		206	55.1945			residue	205	21.5866		205	21.9504
residue	207	57.7516		207	56.0447			residue	206	18.0815		206	18.4216
residue	208	55.2055		208	53.3826			residue	207	17.8864		207	17.9761
residue	209	51.7315		209	50.2086			residue	208	18.0983		208	18.275
residue	210	48.685		210	46.807			residue	209	15.2223		209	15.3755
residue	211	45.3702		211	43.7426			residue	210	15.8608		210	15.995
residue	212	42.0704		212	40.1285			residue	211	15.1263		211	15.2418
residue	213	38.6728		213	36.8992			residue	212	16.3854		212	16.478
residue	214	35.3787		214	33.6284			residue	213	17.7455		213	17.7146
residue	215	35.7277		215	34.2222			residue	214	18.5842		214	18.5455
residue	216	35.5691		216	33.547			residue	215	15.5256		215	15.519
residue	217	36.4599		217	34.5811			residue	216	17.2543		216	17.2908
residue	218	39.8068		218	37.5578			residue	217	16.4502		217	16.4928
residue	219	40.4006		219	38.4224			residue	218	16.7239		218	16.7389
residue	220	39.5685		220	38.2793			residue	219	14.5757		219	14.5415
residue	221	41.8395		221	40.4267			residue	220	11.852		220	11.7904
residue	222	44.5608		222	42.867			residue	221	12.3617		221	12.3512
residue	223	44.3087		223	43.2003			residue	222	12.4253		222	12.415
residue	224	44.5436		224	43.7961			residue	223	9.16489		223	9.07088
residue	225	47.5189		225	46.4213			residue	224	7.97357		224	7.88533
residue	226	49.1308		226	48.0003			residue	225	10.3507		225	10.2909
residue	227	49.4025		227	47.7505			residue	226	9.27577		226	9.22137
residue	228	46.8777		228	45.2574			residue	227	12.4557		227	12.5557
residue	229	47.402		229	46.3205			residue	228	12.2175		228	12.2719
residue	230	43.8587		230	42.9443			residue	229	10.5605		229	10.6306
residue	231	40.4869		231	39.3627			residue	230	10.632		230	10.6541
residue	232	37.8352		232	37.6106			residue	231	13.0668		231	13.0558
residue	233	34.4068		233	34.3278			residue	232	14.9243		232	14.8098
residue	234	31.1397		234	30.966			residue	233	15.8908		233	15.4908
residue	235	28.1253		235	27.836			residue	234	19.2236		234	19.0321
residue	236	25.4814		236	25.245			residue	235	20.166		235	20.426
residue	237	22.7763		237	22.5831			residue	236	23.2293		236	23.3663
residue	238	23.1468		238	22.9158			residue	237	24.4649		237	24.7018
residue	239	22.7541		239	22.6598			residue	238	24.5194		238	25.0001
residue	240	19.4007		240	19.3176			residue	239	26.6293		239	26.8585
residue	241	18.2491		241	18.0919			residue	240	29.0215		240	29.2243
residue	242	19.6033		242	19.4722			residue	241	29.1713		241	29.6688
residue	243	17.8617		243	17.7349			residue	242	29.7938		242	30.4171
residue	244	14.3556		244	14.2318			residue	243	32.4438		243	32.8939
residue	245	15.7094		245	15.6685			residue	244	34.2712		244	34.7686
residue	246	17.1443		246	17.1236			residue	245	34.0038		245	34.6461
residue	247	14.0408		247	13.9768			residue	246	35.4308		246	36.0684
residue	248	12.3169		248	12.3528			residue	247	38.0703		247	38.6447
residue	249	15.5682		249	15.6779			residue	248	39.1918		248	39.7335
residue	250	15.6362		250	15.799			residue	249	39.729		249	40.2599
residue	251	12.2495		251	12.4577			residue	250	41.7621		250	42.2947
residue	252	13.6161		252	13.8933			residue	251	43.8324		251	44.3669
residue	253	16.9126		253	17.2133			residue	252	44.584		252	45.1795
residue	254	19.0963		254	19.2789			residue	253	45.5452		253	46.0493
residue	255	22.1471		255	22.2963			residue	254	42.9504		254	43.439
residue	256	22.1969		256	22.3385			residue	255	41.9125		255	42.2868
residue	257	25.3172		257	25.4459			residue	256	38.5417		256	38.8923
residue	258	26.6525		258	26.6695			residue	257	36.4439		257	36.8953
residue	259	26.972		259	27.053			residue	258	36.6694		258	37.2204
residue	260	25.909		260	26.2762			residue	259	32.9377		259	33.4986
residue	261	28.6406		261	29.0816			residue	260	30.232		260	30.5575
residue	262	27.6267		262	28.2247			residue	261	26.7409		261	27.2173
residue	263	30.3915		263	31.222			residue	262	24.1754		262	24.3917
residue	264	33.1019		264	33.556			residue	263	20.6527		263	20.9872
residue	265	35.5221		265	34.9931			residue	264	17.9419		264	17.9284
residue	266	39.0484		266	38.363			residue	265	14.3162		265	14.6336
residue	267	39.7278		267	39.3503			residue	266	11.8556		266	12.0736
residue	268	43.2986		268	43.0971			residue	267	9.42581		267	9.32927
residue	269	45.3663		269	45.4836			residue	268	6.41665		268	6.55601
residue	270	46.4763		270	46.7239			residue	269	3.82648		269	3.82895

## Sheet: ECFP-RBP-EYFP_Titration
XYDATA	Trial1_ECFP-RBP-EYFP_0.7uM in PBS_0.001uM ribose_433nm.jws	Trial1_ECFP-RBP-EYFP_0.7uM in PBS_0.01uM ribose_433nm.jws	Trial1_ECFP-RBP-EYFP_0.7uM in PBS_0.05uM ribose_433nm.jws	Trial1_ECFP-RBP-EYFP_0.7uM in PBS_0.1uM ribose_433nm.jws	Trial1_ECFP-RBP-EYFP_0.7uM in PBS_0.5uM ribose_433nm.jws	Trial1_ECFP-RBP-EYFP_0.7uM in PBS_1uM ribose_433nm.jws	Trial1_ECFP-RBP-EYFP_0.7uM in PBS_5uM ribose_433nm.jws	Trial1_ECFP-RBP-EYFP_0.7uM in PBS_10uM ribose_433nm.jws	Trial1_ECFP-RBP-EYFP_0.7uM in PBS_100uM ribose_433nm.jws
476 nm	263.143	263.682	260.446	249.289	270.108	276.99	271.115	270.19	271.639
529 nm	266.886	263.093	258.059	246.639	233.184	225.431	212.534	210.648	210.651
XYDATA	Trial2_ECFP-RBP-EYFP_0.7uM in PBS_0.001uM ribose_433nm.jws	Trial2_ECFP-RBP-EYFP_0.7uM in PBS_0.01uM ribose_433nm.jws	Trial2_ECFP-RBP-EYFP_0.7uM in PBS_0.05uM ribose_433nm.jws	Trial2_ECFP-RBP-EYFP_0.7uM in PBS_0.1uM ribose_433nm.jws	Trial2_ECFP-RBP-EYFP_0.7uM in PBS_0.5uM ribose_433nm.jws	Trial2_ECFP-RBP-EYFP_0.7uM in PBS_1uM ribose_433nm.jws	Trial2_ECFP-RBP-EYFP_0.7uM in PBS_5uM ribose_433nm.jws	Trial2_ECFP-RBP-EYFP_0.7uM in PBS_10uM ribose_433nm.jws	Trial2_ECFP-RBP-EYFP_0.7uM in PBS_100uM ribose_433nm.jws
476 nm	241.096	252.704	253.764	253.814	264.722	268.876	270.067	267.932	284.692
529 nm	243.62	252.712	251.244	247.827	229.126	218.005	212.245	210.049	220.243
XYDATA	Trial3_ECFP-RBP-EYFP_0.7uM in PBS_0.001uM ribose_433nm.jws	Trial3_ECFP-RBP-EYFP_0.7uM in PBS_0.01uM ribose_433nm.jws	Trial3_ECFP-RBP-EYFP_0.7uM in PBS_0.05uM ribose_433nm.jws	Trial3_ECFP-RBP-EYFP_0.7uM in PBS_0.1uM ribose_433nm.jws	Trial3_ECFP-RBP-EYFP_0.7uM in PBS_0.5uM ribose_433nm.jws	Trial3_ECFP-RBP-EYFP_0.7uM in PBS_1uM ribose_433nm.jws	Trial3_ECFP-RBP-EYFP_0.7uM in PBS_5uM ribose_433nm.jws	Trial3_ECFP-RBP-EYFP_0.7uM in PBS_10uM ribose_433nm.jws	Trial3_ECFP-RBP-EYFP_0.7uM in PBS_100uM ribose_433nm.jws
476 nm	256.094	248.509	250.587	243.099	266.596	268.442	285.465	274.592	274.604
529 nm	256.184	249.24	247.514	236.02	231.05	216.407	223.111	214.426	213.772
XYDATA	Trial4_ECFP-RBP-EYFP_0.7uM in PBS_0.001uM ribose_433nm.jws	Trial4_ECFP-RBP-EYFP_0.7uM in PBS_0.01uM ribose_433nm.jws	Trial4_ECFP-RBP-EYFP_0.7uM in PBS_0.05uM ribose_433nm.jws	Trial4_ECFP-RBP-EYFP_0.7uM in PBS_0.1uM ribose_433nm.jws	Trial4_ECFP-RBP-EYFP_0.7uM in PBS_0.5uM ribose_433nm.jws	Trial4_ECFP-RBP-EYFP_0.7uM in PBS_1uM ribose_433nm.jws	Trial4_ECFP-RBP-EYFP_0.7uM in PBS_5uM ribose_433nm.jws	Trial4_ECFP-RBP-EYFP_0.7uM in PBS_10uM ribose_433nm.jws	Trial4_ECFP-RBP-EYFP_0.7uM in PBS_100uM ribose_433nm.jws
476 nm	245.576	245.939	243.265	242.192	249.873	258.576	273.323	265.197	277.066
529 nm	248.285	249.748	242.31	238.151	218.855	213.5	214.135	208.361	216.462
	I1: 476 nm						R1/2
Ligand Conc. (uM)	Trial1	Trial2	Trial3	Trial4		Ligand Conc. (uM)	Trial1	Trial2	Trial3	Trial4
0.001	263.143	241.096	256.094	245.576		0.001	0.985975	0.98964	0.999649	0.989089
0.01	263.682	252.704	248.509	245.939		0.01	1.00224	0.999968	0.997067	0.984749
0.05	260.446	253.764	250.587	243.265		0.05	1.00925	1.01003	1.01242	1.00394
0.1	249.289	253.814	243.099	242.192		0.1	1.01074	1.02416	1.02999	1.01697
0.5	270.108	264.722	266.596	249.873		0.5	1.15835	1.15536	1.15385	1.14173
1	276.99	268.876	268.442	258.576		1	1.22871	1.23335	1.24045	1.21113
5	271.115	270.067	285.465	273.323		5	1.27563	1.27243	1.27948	1.27641
10	270.19	267.932	274.592	265.197		10	1.28266	1.27557	1.28059	1.27278
100	271.639	284.692	274.604	277.066		100	1.28952	1.29263	1.28456	1.27998
	I2: 529 nm						R2/1
Ligand Conc. (uM)	Trial1	Trial2	Trial3	Trial4		Ligand Conc. (uM)	Trial1	Trial2	Trial3	Trial4
0.001	266.886	243.62	256.184	248.285		0.001	1.01422	1.01047	1.00035	1.01103
0.01	263.093	252.712	249.24	249.748		0.01	0.997766	1.00003	1.00294	1.01549
0.05	258.059	251.244	247.514	242.31		0.05	0.990835	0.99007	0.987737	0.996074
0.1	246.639	247.827	236.02	238.151		0.1	0.98937	0.976412	0.97088	0.983315
0.5	233.184	229.126	231.05	218.855		0.5	0.863299	0.865534	0.866667	0.875865
1	225.431	218.005	216.407	213.5		1	0.81386	0.810801	0.806159	0.825676
5	212.534	212.245	223.111	214.135		5	0.783926	0.785898	0.78157	0.78345
10	210.648	210.049	214.426	208.361		10	0.779629	0.783964	0.780889	0.785684
100	210.651	220.243	213.772	216.462		100	0.775481	0.773619	0.778474	0.781265
							I1 (avg)	I2 (avg)	R1/2		R2/1
						Ligand Conc. (uM)	I (476 nm)	I (529 nm)	avg	stdev.p	avg	stdev.p
						0.001	251.477	253.744	0.991088	0.00513611	1.00902	0.00520509
						0.01	252.708	253.698	0.996006	0.00675281	1.00406	0.00684981
						0.05	252.016	249.782	1.00891	0.00309625	0.991179	0.00304801
						0.1	247.099	242.159	1.02047	0.00726536	0.979994	0.00697902
						0.5	262.825	228.054	1.15232	0.00632547	0.867841	0.00478828
						1	268.221	218.336	1.22841	0.0108174	0.814124	0.00721105
						5	274.992	215.506	1.27599	0.00250591	0.783711	0.00153925
						10	269.478	210.871	1.2779	0.00392404	0.782542	0.00240356
						100	277	215.282	1.28667	0.00481835	0.77721	0.00291238
						I(1u)	251.477
						I(1b)	277
						I(2u)	253.744
						I(2b)	215.282
XYDATA	Trial2_L1L2Delta_SEC1118-F10_0.7uM in PBS_0.001uM ribose_433nm.jws	Trial2_L1L2Delta_SEC1118-F10_0.7uM in PBS_0.01uM ribose_433nm.jws	Trial2_L1L2Delta_SEC1118-F10_0.7uM in PBS_0.05uM ribose_433nm.jws	Trial2_L1L2Delta_SEC1118-F10_0.7uM in PBS_0.1uM ribose_433nm.jws	Trial2_L1L2Delta_SEC1118-F10_0.7uM in PBS_0.5uM ribose_433nm.jws	Trial2_L1L2Delta_SEC1118-F10_0.7uM in PBS_1uM ribose_433nm.jws	Trial2_L1L2Delta_SEC1118-F10_0.7uM in PBS_5uM ribose_433nm.jws	Trial2_L1L2Delta_SEC1118-F10_0.7uM in PBS_10uM ribose_433nm.jws		XYDATA	Trial3_L1L2Delta_SEC1118-F10_0.7uM in PBS_0.001uM ribose_433nm.jws	Trial3_L1L2Delta_SEC1118-F10_0.7uM in PBS_0.01uM ribose_433nm.jws	Trial3_L1L2Delta_SEC1118-F10_0.7uM in PBS_0.05uM ribose_433nm.jws	Trial3_L1L2Delta_SEC1118-F10_0.7uM in PBS_0.1uM ribose_433nm.jws
400	0.409621	0.432081	0.426514	0.485019	0.484262	0.469775	0.421913	0.393068		400	0.0946203	0.0552179	0.102414	0.0878937
401	0.409674	0.429426	0.425669	0.481502	0.48092	0.467629	0.423524	0.394969		401	0.092138	0.0546671	0.0988974	0.086954
402	0.409824	0.428431	0.4278	0.477479	0.476153	0.462388	0.423794	0.392851		402	0.087425	0.0491536	0.0905023	0.0811611
403	0.410435	0.426249	0.426576	0.470788	0.469816	0.459748	0.421269	0.390743		403	0.0845558	0.0490366	0.0867545	0.0805539
404	0.410888	0.428165	0.425793	0.468382	0.465513	0.457653	0.418349	0.39237		404	0.0804461	0.0484135	0.0846457	0.0759208
405	0.406641	0.424924	0.427118	0.464655	0.463105	0.453399	0.417463	0.390592		405	0.0816083	0.0539039	0.0900874	0.0793849
406	0.402142	0.420857	0.423845	0.462139	0.459537	0.444818	0.413049	0.385227		406	0.0792211	0.0540617	0.0873927	0.0781237
407	0.400198	0.419124	0.421976	0.460874	0.45607	0.440716	0.412615	0.385024		407	0.0783172	0.0527737	0.0868241	0.0756238
408	0.398966	0.416244	0.42186	0.45753	0.451836	0.436102	0.408034	0.383758		408	0.0742686	0.054385	0.0836436	0.0722504
409	0.3995	0.412733	0.422675	0.454368	0.447461	0.435125	0.408315	0.38156		409	0.0745265	0.0550134	0.0818368	0.0726888
410	0.396028	0.407566	0.417075	0.450597	0.446752	0.427425	0.404004	0.37808		410	0.0751445	0.0531645	0.081494	0.0737149
411	0.391788	0.402073	0.413296	0.448515	0.446171	0.42466	0.401409	0.377017		411	0.0778904	0.0572971	0.0836296	0.0739721
412	0.386076	0.398485	0.412055	0.445922	0.443734	0.417027	0.399922	0.377343		412	0.0768628	0.0601873	0.0860724	0.074988
413	0.382342	0.391772	0.410645	0.44317	0.445667	0.41581	0.401608	0.377949		413	0.0733979	0.0600854	0.0853165	0.0737284
414	0.380159	0.390242	0.411658	0.442902	0.444444	0.415554	0.403353	0.380561		414	0.069648	0.0580689	0.0842641	0.074486
415	0.381518	0.389707	0.412611	0.443254	0.439725	0.414955	0.403925	0.381979		415	0.0686315	0.0566725	0.0858512	0.0792626
416	0.384698	0.393936	0.416203	0.443038	0.444114	0.42003	0.409374	0.384356		416	0.0668954	0.0575096	0.0872734	0.0801035
417	0.388089	0.398398	0.41611	0.444783	0.447717	0.421097	0.410703	0.383493		417	0.0682112	0.0578363	0.0900656	0.0846824
418	0.386818	0.400184	0.413217	0.443838	0.44675	0.420361	0.409029	0.382608		418	0.0699971	0.0617113	0.0947944	0.0872695
419	0.389133	0.402876	0.420128	0.443599	0.446836	0.425217	0.411081	0.387159		419	0.0715898	0.0647652	0.0989881	0.0889585
420	0.394084	0.411839	0.425801	0.445395	0.453151	0.42979	0.419595	0.393025		420	0.0703335	0.0627875	0.101013	0.0887025
421	0.4054	0.426082	0.435029	0.452919	0.46151	0.441273	0.429879	0.403178		421	0.0748975	0.0670116	0.106202	0.0903766
422	0.452827	0.4729	0.484098	0.499485	0.508659	0.486877	0.476708	0.445078		422	0.0904293	0.0854026	0.120427	0.105856
423	0.657652	0.656863	0.69156	0.70033	0.723457	0.69025	0.669337	0.634752		423	0.132387	0.136507	0.148004	0.15254
424	1.28069	1.20639	1.32223	1.30089	1.3601	1.30069	1.24459	1.20448		424	0.180346	0.248198	0.157291	0.218278
425	2.77699	2.50897	2.78004	2.71489	2.85337	2.76627	2.60849	2.56524		425	0.0170305	0.201837	-0.0779173	0.10195
426	5.86019	5.17672	5.73266	5.61524	5.9501	5.76781	5.44382	5.39563		426	-0.825955	-0.374319	-1.06367	-0.590935
427	11.0165	9.69176	10.6465	10.4874	11.3291	10.805	10.1431	10.055		427	-2.72868	-1.86157	-3.2794	-2.42717
428	17.6647	15.3642	16.7242	16.6549	18.2027	17.1637	16.0207	15.9786		428	-5.83969	-4.36037	-6.73963	-5.39849
429	24.7129	20.9967	22.807	22.93	25.3309	23.5841	22.0065	21.8772		429	-10.137	-7.66483	-11.1907	-9.30585
430	29.8879	24.5467	26.8467	27.0161	30.329	27.8413	25.8575	25.7137		430	-14.7678	-11.4607	-16.0482	-13.6626
431	32.1529	25.1278	27.8336	28.0291	32.2849	29.0885	26.807	26.5841		431	-18.9858	-14.9425	-20.4924	-17.6965
432	30.7313	22.331	25.278	25.4406	30.3138	26.6436	24.2398	23.9548		432	-21.9674	-17.5055	-23.7684	-20.623
433	26.2159	16.8988	19.948	19.9803	25.286	21.3208	18.9334	18.546		433	-23.5256	-19.1921	-25.7134	-22.4018
434	20.0128	10.1924	13.1726	13.1507	18.6289	14.5493	12.3171	11.7969		434	-24.0786	-19.8361	-26.3918	-23.0691
435	12.7367	3.05813	5.70032	5.67429	11.0695	7.06496	4.96914	4.48824		435	-23.3422	-19.3996	-25.5002	-22.431
436	4.78016	-4.13615	-2.00233	-2.03595	2.81655	-0.769097	-2.52261	-2.97656		436	-21.1319	-17.7028	-23.0384	-20.3095
437	-3.19321	-10.9357	-9.26262	-9.37085	-5.31036	-8.32219	-9.60927	-10.0615		437	-17.5127	-14.7547	-19.1	-16.8941
438	-10.0452	-16.2956	-15.11	-15.285	-12.2047	-14.4351	-15.2769	-15.6841		438	-12.7705	-11.0136	-14.2051	-12.6164
439	-14.2731	-18.82	-18.0584	-18.3427	-16.1701	-17.5962	-18.0829	-18.5197		439	-7.67287	-6.887	-8.98219	-7.9448
440	-15.3403	-18.2736	-17.8598	-18.113	-16.807	-17.6195	-17.7267	-18.1068		440	-3.29742	-3.215	-4.43602	-3.79941
441	-12.7637	-14.4505	-14.2081	-14.4363	-13.6871	-14.0914	-14.0666	-14.3279		441	-0.230917	-0.396312	-1.06992	-0.641753
442	-8.03914	-8.82489	-8.66177	-8.86433	-8.44781	-8.54561	-8.49098	-8.65673		442	1.66031	1.55105	1.18949	1.37711
443	-2.84374	-3.05464	-2.96828	-3.04312	-2.8082	-2.82173	-2.74627	-2.82474		443	3.00711	2.9	2.76165	2.7817
444	1.38361	1.46247	1.47823	1.49537	1.69626	1.71605	1.76115	1.71607		444	4.1012	4.01888	3.97986	3.91903
445	4.30583	4.52688	4.51975	4.59278	4.79487	4.83171	4.88094	4.83937		445	5.22807	5.13133	5.13744	5.00448
446	6.27473	6.59751	6.57244	6.66155	6.90252	6.95521	7.01511	6.97135		446	6.52129	6.4047	6.41714	6.23889
447	7.9239	8.32405	8.30448	8.36979	8.69138	8.76715	8.84318	8.7828		447	8.1229	7.96948	7.98838	7.75173
448	9.75453	10.2433	10.2425	10.3116	10.7037	10.814	10.9046	10.8263		448	10.0655	9.8588	9.87142	9.60868
449	12.0009	12.5866	12.5752	12.684	13.1481	13.2872	13.4069	13.3197		449	12.4354	12.2014	12.1971	11.8929
450	14.7491	15.4423	15.4533	15.582	16.1456	16.3341	16.4702	16.355		450	15.3744	15.0637	15.0722	14.6712
451	18.0598	18.8996	18.9046	19.0652	19.7551	19.9897	20.1427	20.036		451	18.884	18.48	18.498	18.0061
452	22.0347	23.0845	23.0766	23.2706	24.1347	24.4422	24.615	24.4994		452	23.1466	22.6356	22.6536	22.0723
453	26.7812	28.0642	28.0654	28.2977	29.3512	29.7353	29.9492	29.7716		453	28.2044	27.5772	27.5905	26.891
454	32.4022	33.9011	33.9531	34.2065	35.5178	35.9501	36.2249	36.0099		454	34.1559	33.3736	33.4224	32.5596
455	38.969	40.7896	40.8755	41.1424	42.7479	43.2662	43.6163	43.3569		455	41.1537	40.2135	40.2586	39.2367
456	46.4959	48.6684	48.8256	49.116	51.0241	51.6866	52.0388	51.7095		456	49.1946	48.0332	48.1209	46.8652
457	55.1632	57.7287	57.9354	58.2172	60.5108	61.3553	61.771	61.3164		457	58.431	56.9876	57.1776	55.5732
458	64.8775	67.9259	68.2075	68.4039	71.1788	72.2138	72.6495	72.1184		458	68.7834	67.0471	67.3286	65.4202
459	75.6238	79.204	79.5543	79.7574	82.9998	84.2418	84.7033	84.121		459	80.2368	78.1965	78.5631	76.3283
460	87.4451	91.5997	91.9999	92.2166	95.9964	97.4689	97.9646	97.2243		460	92.8299	90.4322	90.8902	88.2618
461	100.066	104.83	105.321	105.534	109.905	111.612	112.159	111.329		461	106.333	103.513	104.072	101.057
462	113.503	118.964	119.497	119.701	124.66	126.618	127.234	126.293		462	120.671	117.358	118.084	114.629
463	127.446	133.604	134.216	134.305	139.887	142.209	142.862	141.744		463	135.508	131.684	132.581	128.661
464	141.669	148.542	149.148	149.29	155.488	158.097	158.761	157.574		464	150.656	146.306	147.335	142.949
465	155.839	163.489	164.068	164.228	171.139	173.918	174.684	173.417		465	165.729	160.995	162.111	157.304
466	169.732	178.091	178.663	178.865	186.39	189.442	190.266	188.93		466	180.482	175.301	176.545	171.283
467	183.039	192.014	192.622	192.86	200.974	204.314	205.162	203.632		467	194.588	188.961	190.34	184.626
468	195.421	204.99	205.702	205.886	214.672	218.2	219.047	217.402		468	207.764	201.699	203.247	197.136
469	206.521	216.685	217.438	217.579	226.927	230.651	231.524	229.823		469	219.598	213.118	214.823	208.358
470	216.31	227.026	227.724	227.896	237.727	241.591	242.515	240.712		470	230.036	223.226	225.029	218.253
471	224.569	235.625	236.332	236.535	246.769	250.787	251.641	249.859		471	238.788	231.673	233.513	226.591
472	231.11	242.442	243.205	243.41	253.991	258.044	258.97	257.064		472	245.714	238.429	240.302	233.225
473	236.045	247.525	248.45	248.536	259.306	263.449	264.486	262.532		473	250.909	243.381	245.384	238.146
474	239.26	250.799	251.819	251.838	262.768	266.985	268.06	266.029		474	254.257	246.606	248.655	241.29
475	240.952	252.537	253.59	253.642	264.594	268.786	269.895	267.788		475	255.952	248.352	250.438	242.996
476	241.096	252.704	253.764	253.814	264.722	268.876	270.067	267.932		476	256.094	248.509	250.587	243.099
477	240.072	251.651	252.72	252.767	263.56	267.78	268.928	266.809		477	255.064	247.53	249.482	242.045
478	238.001	249.402	250.525	250.551	261.186	265.416	266.526	264.427		478	252.77	245.292	247.263	239.862
479	235.162	246.337	247.524	247.528	257.974	262.194	263.256	261.179		479	249.658	242.347	244.294	236.899
480	231.643	242.688	243.856	243.849	254.092	258.25	259.282	257.176		480	245.831	238.733	240.565	233.27
481	227.686	238.643	239.74	239.786	249.871	253.877	254.865	252.795		481	241.675	234.743	236.548	229.316
482	223.611	234.363	235.443	235.449	245.409	249.257	250.182	248.134		482	237.307	230.532	232.267	225.185
483	219.522	230.065	231.127	231.123	240.76	244.532	245.511	243.413		483	232.951	226.231	227.954	220.993
484	215.477	225.848	226.875	226.825	236.263	239.986	240.926	238.903		484	228.672	222.015	223.753	216.875
485	211.669	221.764	222.82	222.768	231.98	235.565	236.553	234.555		485	224.552	217.99	219.723	212.949
486	208.082	218	219.014	218.906	227.924	231.388	232.448	230.425		486	220.652	214.249	215.946	209.316
487	204.614	214.4	215.444	215.216	224.073	227.458	228.492	226.528		487	217.021	210.68	212.365	205.826
488	201.269	210.896	211.948	211.652	220.383	223.651	224.702	222.759		488	213.517	207.165	208.827	202.491
489	197.94	207.386	208.475	208.136	216.664	219.904	220.88	219.042		489	210.024	203.731	205.395	199.169
490	194.62	203.824	204.924	204.612	212.834	216.087	217.051	215.251		490	206.436	200.25	201.908	195.719
491	191.118	200.12	201.183	200.9	208.905	212.099	213.044	211.294		491	202.691	196.528	198.214	192.07
492	187.269	196.079	197.177	196.905	204.695	207.838	208.724	206.976		492	198.624	192.566	194.242	188.203
493	183.095	191.751	192.822	192.574	200.139	203.248	204.076	202.352		493	194.213	188.337	190.018	184.03
494	178.614	187.043	188.156	187.94	195.253	198.287	199.09	197.413		494	189.478	183.757	185.438	179.582
495	173.937	182.134	183.249	183.085	190.149	193.046	193.818	192.184		495	184.504	178.991	180.63	174.874
496	169.191	177.143	178.2	178.121	184.838	187.718	188.4	186.838		496	179.442	174.123	175.669	169.99
497	164.422	172.1	173.18	173.103	179.634	182.396	183.091	181.492		497	174.408	169.229	170.793	165.16
498	159.821	167.308	168.305	168.221	174.557	177.177	177.892	176.225		498	169.502	164.456	165.991	160.45
499	155.511	162.756	163.729	163.692	169.711	172.265	172.921	171.259		499	164.877	160.062	161.528	156.065
500	151.654	158.666	159.704	159.637	165.379	167.83	168.48	166.863		500	160.752	156.147	157.475	152.169
501	148.368	155.187	156.169	156.126	161.61	163.916	164.507	163.019		501	157.172	152.676	153.966	148.816
502	145.672	152.343	153.271	153.169	158.458	160.618	161.173	159.728		502	154.244	149.877	151.055	146.01
503	143.586	150.123	151.014	150.861	155.959	157.975	158.468	157.018		503	151.971	147.651	148.823	143.845
504	142.176	148.495	149.422	149.216	154.063	155.962	156.38	155		504	150.366	146.137	147.264	142.277
505	141.336	147.595	148.456	148.225	152.713	154.529	154.888	153.497		505	149.386	145.216	146.343	141.36
506	141.113	147.349	148.197	147.844	151.925	153.59	153.841	152.528		506	149.02	144.908	146.016	141.023
507	141.458	147.682	148.494	148.037	151.749	153.185	153.306	152.024		507	149.323	145.224	146.282	141.242
508	142.34	148.597	149.342	148.772	152.039	153.251	153.201	151.9		508	150.151	146.125	147.111	141.979
509	143.857	150.078	150.827	150.119	152.775	153.67	153.507	152.183		509	151.652	147.609	148.506	143.242
510	145.944	152.142	152.803	152.035	153.987	154.513	154.155	152.799		510	153.702	149.659	150.467	145.048
511	148.644	154.827	155.424	154.536	155.666	155.796	155.191	153.845		511	156.434	152.343	152.998	147.442
512	151.989	158.209	158.716	157.731	157.892	157.463	156.652	155.284		512	159.805	155.62	156.134	150.429
513	155.941	162.266	162.635	161.519	160.627	159.637	158.548	157.146		513	163.881	159.587	159.965	153.999
514	160.627	167.07	167.276	165.993	163.991	162.357	160.975	159.524		514	168.721	164.338	164.531	158.282
515	165.927	172.521	172.603	171.14	167.903	165.668	163.849	162.357		515	174.251	169.713	169.762	163.17
516	172.057	178.762	178.682	176.995	172.463	169.455	167.247	165.726		516	180.558	175.816	175.736	168.793
517	178.715	185.588	185.409	183.531	177.557	173.735	171.151	169.598		517	187.483	182.564	182.286	174.971
518	185.875	192.964	192.669	190.577	183.128	178.487	175.527	173.88		518	194.97	189.857	189.368	181.634
519	193.405	200.736	200.212	197.965	189.028	183.534	180.239	178.469		519	202.841	197.514	196.889	188.713
520	201.081	208.615	207.936	205.496	195.179	188.835	185.096	183.256		520	210.846	205.297	204.613	195.893
521	208.753	216.501	215.717	213.026	201.269	194.105	189.989	188.106		521	218.893	213.132	212.243	203.032
522	216.07	224.07	223.159	220.286	207.218	199.251	194.741	192.819		522	226.654	220.657	219.559	209.939
523	222.971	231.176	230.105	227.148	212.738	204.035	199.249	197.302		523	233.915	227.675	226.477	216.392
524	229.042	237.497	236.353	233.261	217.683	208.326	203.32	201.301		524	240.373	233.988	232.63	222.164
525	234.285	242.89	241.654	238.475	221.922	211.99	206.731	204.657		525	245.967	239.383	237.871	227.135
526	238.389	247.236	245.836	242.556	225.226	214.847	209.362	207.244		526	250.461	243.704	242.14	231.104
527	241.34	250.284	248.849	245.505	227.563	216.831	211.154	208.988		527	253.633	246.776	245.162	233.882
528	243.108	252.124	250.733	247.285	228.88	217.898	212.141	209.964		528	255.546	248.681	246.938	235.575
529	243.62	252.712	251.244	247.827	229.126	218.005	212.245	210.049		529	256.184	249.24	247.514	236.02
530	242.937	252.019	250.557	247.129	228.299	217.236	211.413	209.202		530	255.492	248.638	246.845	235.395
531	241.212	250.196	248.717	245.316	226.624	215.591	209.853	207.546		531	253.75	246.906	245.059	233.671
532	238.455	247.307	245.795	242.43	223.971	213.149	207.44	205.11		532	250.834	244.065	242.195	230.952
533	234.773	243.533	242.037	238.67	220.634	209.96	204.363	202.133		533	246.942	240.328	238.468	227.384
534	230.356	238.975	237.533	234.216	216.632	206.25	200.723	198.576		534	242.248	235.84	234.003	223.069
535	225.348	233.731	232.399	229.109	212.028	201.993	196.649	194.584		535	236.956	230.667	228.835	218.184
536	219.861	227.979	226.642	223.555	207.007	197.377	192.204	190.142		536	231.123	225.018	223.244	212.867
537	213.922	221.804	220.604	217.634	201.705	192.454	187.427	185.475		537	224.954	219.027	217.252	207.17
538	207.805	215.453	214.291	211.405	196.189	187.258	182.478	180.614		538	218.575	212.736	211.034	201.251
539	201.498	208.943	207.859	205.093	190.524	181.909	177.341	175.613		539	211.95	206.287	204.665	195.227
540	195.224	202.483	201.422	198.779	184.856	176.598	172.226	170.611		540	205.316	199.882	198.285	189.196
541	187.697	194.815	193.277	191.087	177.815	170.084	166.043	164.426		541	198.257	192.115	190.375	181.953
542	181.403	188.383	186.844	184.757	172.125	164.752	160.896	159.313		542	191.709	185.693	184.033	175.942
543	175.229	182.01	180.572	178.614	166.553	159.499	155.807	154.284		543	185.297	179.397	177.835	169.983
544	169.194	175.791	174.428	172.5	161.039	154.324	150.816	149.361		544	178.936	173.207	171.744	164.184
545	163.404	169.769	168.438	166.534	155.698	149.239	145.949	144.52		545	172.817	167.204	165.815	158.507
546	157.761	163.898	162.616	160.819	150.464	144.337	141.135	139.749		546	166.838	161.394	160.103	152.989
547	152.301	158.198	156.918	155.316	145.367	139.472	136.473	135.126		547	161.086	155.816	154.524	147.649
548	147.043	152.696	151.551	149.981	140.468	134.839	131.964	130.612		548	155.509	150.418	149.195	142.526
549	142.016	147.404	146.348	144.836	135.744	130.273	127.55	126.257		549	150.165	145.254	144.054	137.608
550	137.156	142.35	141.384	139.893	131.221	125.902	123.346	122.035		550	145.129	140.32	139.119	132.935
551	132.535	137.577	136.648	135.196	126.808	121.686	119.266	117.963		551	140.217	135.609	134.424	128.477
552	128.176	133.034	132.083	130.695	122.592	117.684	115.357	114.068		552	135.617	131.095	129.926	124.241
553	123.998	128.67	127.79	126.427	118.548	113.819	111.582	110.344		553	131.195	126.816	125.653	120.189
554	120	124.551	123.612	122.314	114.733	110.115	107.956	106.721		554	126.94	122.72	121.558	116.338
555	116.177	120.563	119.708	118.408	111.052	106.555	104.427	103.259		555	122.907	118.763	117.623	112.716
556	112.528	116.781	115.946	114.701	107.522	103.153	101.026	99.8948		556	119.062	115.007	113.884	109.176
557	109.022	113.186	112.33	111.164	104.12	99.8446	97.7526	96.6631		557	115.381	111.427	110.306	105.723
558	105.669	109.703	108.869	107.803	100.862	96.7158	94.6323	93.5765		558	111.768	107.991	106.901	102.458
559	102.484	106.33	105.471	104.517	97.7762	93.6437	91.6188	90.6231		559	108.372	104.682	103.625	99.2969
560	99.3429	103.117	102.255	101.307	94.7685	90.6979	88.7215	87.7224		560	105.085	101.493	100.476	96.2198
561	96.2933	99.9926	99.1129	98.2585	91.8128	87.8257	85.9388	84.908		561	101.924	98.4064	97.4116	93.317
562	93.3336	96.9432	96.1281	95.2482	88.935	85.0722	83.2008	82.2006		562	98.8843	95.4187	94.4391	90.4252
563	90.5206	93.9861	93.2155	92.365	86.1367	82.4274	80.5607	79.5955		563	95.8962	92.499	91.5452	87.6002
564	87.7227	91.1031	90.3641	89.5016	83.4238	79.7828	78.0368	77.0863		564	92.9785	89.6478	88.7579	84.9194
565	85.0039	88.2517	87.5382	86.6937	80.7716	77.2554	75.5029	74.6296		565	90.1087	86.8556	86.0391	82.2798
566	82.3641	85.5008	84.7725	83.9525	78.166	74.7548	73.0604	72.2178		566	87.3034	84.1189	83.3421	79.6735
567	79.7299	82.7727	82.0984	81.2507	75.5757	72.2987	70.6751	69.8605		567	84.5172	81.4235	80.6771	77.1157
568	77.1748	80.0905	79.4562	78.6529	73.0406	69.9245	68.3098	67.5408		568	81.8152	78.7888	77.9925	74.6122
569	74.6429	77.4867	76.8801	76.0467	70.6091	67.6062	65.9718	65.2839		569	79.1205	76.1589	75.3814	72.1123
570	72.1642	74.8921	74.2947	73.513	68.2316	65.3182	63.7261	63.0833		570	76.3958	73.5826	72.8318	69.6897
571	69.6996	72.3324	71.7694	70.9788	65.8744	63.0612	61.5199	60.9125		571	73.7657	71.0701	70.3405	67.3034
572	67.3076	69.8197	69.285	68.4988	63.5503	60.8705	59.3569	58.7945		572	71.1965	68.5996	67.8618	64.9305
573	64.9335	67.3389	66.8406	66.0959	61.333	58.6966	57.2656	56.7127		573	68.6809	66.1424	65.4036	62.6231
574	62.59	64.9097	64.4402	63.7442	59.1116	56.5846	55.2198	54.6629		574	66.2215	63.7486	63.0233	60.3469
575	60.285	62.508	62.0574	61.381	56.9825	54.527	53.2057	52.6621		575	63.7696	61.379	60.6758	58.0974
576	58.0464	60.1469	59.7301	59.0948	54.8689	52.5179	51.2443	50.7238		576	61.3525	59.0941	58.4207	55.9365
577	55.8405	57.8464	57.4454	56.8692	52.8093	50.5337	49.3293	48.8642		577	58.9934	56.863	56.1959	53.7878
578	53.6612	55.5893	55.2076	54.6938	50.8138	48.6245	47.467	47.0179		578	56.7339	54.6859	54.0192	51.7128
579	51.5783	53.4116	53.0174	52.5643	48.8671	46.7682	45.6491	45.2507		579	54.5244	52.5443	51.8937	49.6698
580	49.5225	51.3007	50.9065	50.4833	46.9669	44.9423	43.9063	43.5161		580	52.3525	50.4375	49.8423	47.6962
581	47.5583	49.2527	48.8521	48.4696	45.0845	43.2009	42.1854	41.8357		581	50.255	48.4551	47.8579	45.7828
582	45.6235	47.2429	46.8757	46.5048	43.2845	41.4958	40.528	40.2016		582	48.2157	46.4628	45.9188	43.9207
583	43.7833	45.3153	44.9654	44.6336	41.5419	39.8659	38.9365	38.6286		583	46.2524	44.564	44.0399	42.1587
584	41.9954	43.4675	43.1305	42.8103	39.8638	38.2745	37.391	37.1013		584	44.3535	42.7399	42.2333	40.445
585	40.2514	41.6844	41.3484	41.0361	38.2496	36.7293	35.9136	35.6256		585	42.5171	40.9556	40.4676	38.7796
586	38.6047	39.9516	39.6416	39.3241	36.6869	35.2646	34.4696	34.1904		586	40.7513	39.2478	38.8015	37.1799
587	36.9978	38.2855	38.0377	37.6926	35.1771	33.8145	33.0898	32.8094		587	39.0532	37.5878	37.165	35.634
588	35.4266	36.6918	36.4668	36.1286	33.7398	32.4359	31.7706	31.473		588	37.421	36.0121	35.6133	34.1679
589	33.9306	35.1603	34.9484	34.6177	32.3585	31.0884	30.5055	30.182		589	35.8387	34.4851	34.1364	32.7042
590	32.5159	33.6888	33.5175	33.1546	31.0416	29.8069	29.2769	28.9695		590	34.2966	33.0258	32.6885	31.3397
591	31.1554	32.2779	32.1196	31.762	29.7642	28.5912	28.0745	27.8101		591	32.8497	31.6334	31.3156	30.0139
592	29.8424	30.9284	30.7877	30.4342	28.5347	27.4151	26.9463	26.6929		592	31.443	30.3057	29.9833	28.7388
593	28.6016	29.618	29.5071	29.1646	27.3587	26.3086	25.8456	25.5964		593	30.1046	29.0142	28.7448	27.5295
594	27.387	28.3876	28.2542	27.9568	26.233	25.2247	24.7998	24.573		594	28.8181	27.7781	27.5187	26.3572
595	26.2538	27.1959	27.0578	26.7922	25.1606	24.2099	23.7917	23.5868		595	27.5892	26.5982	26.3675	25.226
596	25.1638	26.0459	25.9162	25.659	24.107	23.2286	22.799	22.6365		596	26.4199	25.4852	25.2611	24.1622
597	24.1139	24.9618	24.8319	24.5832	23.1201	22.2899	21.8655	21.7356		597	25.295	24.4183	24.181	23.1606
598	23.1194	23.9125	23.7806	23.5929	22.1722	21.3801	20.9683	20.8559		598	24.2424	23.3949	23.1596	22.1743
599	22.1574	22.9462	22.8006	22.6045	21.2506	20.4928	20.1281	19.9962		599	23.2274	22.4118	22.1904	21.2501
600	21.247	21.9947	21.8405	21.6881	20.3836	19.6581	19.2952	19.1721		600	22.2563	21.4622	21.2638	20.3466
601	20.3645	21.0775	20.9369	20.8225	19.5547	18.842	18.5095	18.3963		601	21.3387	20.566	20.3393	19.4867
602	19.5459	20.2155	20.0822	19.9747	18.7569	18.0766	17.753	17.6394		602	20.449	19.7305	19.491	18.669
603	18.7528	19.3838	19.281	19.1561	17.9943	17.3316	17.0391	16.9194		603	19.6107	18.9168	18.6996	17.8997
604	18.0119	18.6057	18.5018	18.3814	17.2682	16.6311	16.3559	16.2182		604	18.7982	18.1284	17.9364	17.1577
605	17.2662	17.8488	17.7575	17.6358	16.5595	15.9503	15.7071	15.5726		605	18.038	17.3772	17.1944	16.457
606	16.5599	17.146	17.0423	16.9192	15.8977	15.3106	15.0726	14.9311		606	17.3046	16.6737	16.5028	15.7907
607	15.8926	16.4477	16.3537	16.2338	15.2666	14.7113	14.4753	14.3417		607	16.5905	15.9999	15.8237	15.155
608	15.2594	15.7765	15.724	15.5783	14.6705	14.1228	13.9127	13.7829		608	15.9083	15.3653	15.1838	14.558
609	14.6539	15.163	15.0854	14.9434	14.1013	13.5698	13.3628	13.2425		609	15.2571	14.7563	14.5999	13.9742
610	14.0576	14.5487	14.4991	14.3403	13.5379	13.0375	12.826	12.7151		610	14.6469	14.1581	14.0179	13.4094
611	13.4899	13.9804	13.9134	13.7873	13.013	12.534	12.3143	12.2218		611	14.046	13.6004	13.4407	12.8698
612	12.9453	13.4309	13.3672	13.2699	12.5182	12.0393	11.8345	11.7693		612	13.4816	13.0594	12.8932	12.3592
613	12.4602	12.9159	12.8448	12.7605	12.049	11.5806	11.359	11.306		613	12.9433	12.5401	12.3863	11.8725
614	11.9779	12.3981	12.34	12.2629	11.5852	11.1448	10.9247	10.8729		614	12.4271	12.0419	11.8919	11.4144
615	11.5185	11.9188	11.8588	11.7856	11.1385	10.7175	10.5013	10.4622		615	11.9243	11.5679	11.4247	10.9587
616	11.0743	11.466	11.3908	11.3386	10.7019	10.3122	10.0865	10.0622		616	11.45	11.1088	10.9722	10.5068
617	10.6426	11.0282	10.9575	10.8974	10.277	9.91126	9.68804	9.67962		617	10.9986	10.6486	10.5347	10.0909
618	10.2353	10.6092	10.5221	10.4789	9.89337	9.52247	9.33449	9.31669		618	10.5692	10.2203	10.124	9.70183
619	9.84942	10.2061	10.1176	10.0697	9.48818	9.15518	8.98853	8.95603		619	10.1581	9.80401	9.72895	9.32409
620	9.47392	9.80941	9.73346	9.66189	9.11423	8.80485	8.64185	8.59729		620	9.759	9.41474	9.33726	8.95244
621	9.10472	9.42833	9.35992	9.28146	8.74935	8.47114	8.31778	8.27851		621	9.37913	9.04162	8.96393	8.60211
622	8.76826	9.0673	8.99273	8.91532	8.42172	8.13666	8.00336	7.97001		622	9.0117	8.69411	8.59845	8.25564
623	8.4186	8.72072	8.64246	8.57827	8.10526	7.82194	7.70331	7.6593		623	8.6615	8.34201	8.25745	7.93513
624	8.09181	8.3909	8.3128	8.2458	7.78969	7.51873	7.41502	7.36313		624	8.32328	8.00362	7.93737	7.63303
625	7.78864	8.06137	7.99555	7.93325	7.49379	7.22926	7.14155	7.08633		625	7.9992	7.69803	7.62402	7.33748
626	7.49546	7.75155	7.69756	7.62729	7.19494	6.95297	6.86123	6.81836		626	7.6769	7.40235	7.31895	7.04154
627	7.20876	7.44114	7.39999	7.32862	6.93378	6.68552	6.60097	6.56476		627	7.3663	7.10855	7.02696	6.7611
628	6.92674	7.15434	7.11824	7.04697	6.67199	6.42544	6.3538	6.32655		628	7.0623	6.82771	6.75227	6.48982
629	6.65286	6.88006	6.85022	6.78498	6.42424	6.17693	6.12388	6.08485		629	6.7732	6.54045	6.4892	6.23121
630	6.38144	6.61897	6.59635	6.53417	6.17422	5.94919	5.8915	5.8484		630	6.49022	6.27282	6.24574	5.98132
631	6.13819	6.36668	6.34995	6.2825	5.93863	5.72276	5.66284	5.62285		631	6.23204	6.01635	5.99634	5.73923
632	5.90347	6.1205	6.10322	6.02937	5.7182	5.51142	5.45698	5.42068		632	5.98143	5.77644	5.7483	5.50285
633	5.67479	5.88754	5.87376	5.80329	5.50108	5.31082	5.25876	5.21734		633	5.73463	5.53452	5.51808	5.28502
634	5.44916	5.65923	5.64612	5.58409	5.30103	5.10828	5.06745	5.02538		634	5.50131	5.30487	5.29871	5.07417
635	5.239	5.44754	5.43441	5.37818	5.10161	4.92701	4.87346	4.8356		635	5.28448	5.09218	5.07686	4.86329
636	5.04412	5.24772	5.22784	5.1828	4.90502	4.74933	4.68847	4.64726		636	5.07762	4.87626	4.87653	4.66682
637	4.86229	5.04205	5.02415	4.97592	4.71902	4.56148	4.50769	4.47105		637	4.87097	4.68681	4.67284	4.47584
638	4.68197	4.84892	4.83488	4.78621	4.54007	4.38436	4.3482	4.32024		638	4.68123	4.49273	4.47646	4.29128
639	4.49847	4.66351	4.6398	4.60105	4.3578	4.21919	4.18054	4.16032		639	4.47767	4.3042	4.2899	4.11566
640	4.32614	4.48717	4.46115	4.43449	4.19851	4.0566	4.02286	3.99814		640	4.29711	4.13165	4.10847	3.94897
641	4.16679	4.31896	4.28489	4.26067	4.03921	3.91106	3.87339	3.8498		641	4.12594	3.95977	3.93808	3.79018
642	4.00298	4.15284	4.12219	4.09026	3.88906	3.77065	3.72272	3.71001		642	3.9595	3.79407	3.78082	3.63742
643	3.84776	4.00059	3.95425	3.92772	3.73605	3.61743	3.59354	3.55906		643	3.80083	3.64076	3.62918	3.49367
644	3.69665	3.83763	3.79572	3.77785	3.59714	3.47882	3.45875	3.42612		644	3.64798	3.49427	3.47961	3.35581
645	3.55022	3.68757	3.65604	3.63933	3.46252	3.35765	3.33147	3.30479		645	3.49997	3.34542	3.33882	3.21904
646	3.41633	3.54834	3.51483	3.5058	3.33131	3.22885	3.20683	3.17045		646	3.35235	3.21415	3.19883	3.09246
647	3.28094	3.40655	3.38401	3.378	3.21593	3.10469	3.09298	3.05881		647	3.22112	3.08081	3.0748	2.97667
648	3.14859	3.27715	3.24962	3.25015	3.09376	2.99158	2.97664	2.94773		648	3.08445	2.94339	2.95172	2.85115
649	3.02266	3.15278	3.12627	3.12721	2.97457	2.87432	2.86227	2.83715		649	2.95244	2.82582	2.82725	2.73437
650	2.91349	3.03602	3.00501	3.01588	2.86534	2.77176	2.75811	2.73677		650	2.82946	2.71172	2.70696	2.61968
651	2.80799	2.91514	2.89564	2.90722	2.7618	2.67181	2.64732	2.64223		651	2.70443	2.59852	2.5925	2.51403
652	2.70629	2.80576	2.79843	2.79832	2.657	2.57242	2.54631	2.55238		652	2.58672	2.49515	2.47858	2.41065
653	2.60084	2.69927	2.68757	2.69038	2.55747	2.47409	2.44911	2.45923		653	2.48394	2.39343	2.37819	2.30885
654	2.49767	2.59353	2.59008	2.59274	2.46743	2.38583	2.35595	2.37012		654	2.37714	2.29773	2.27685	2.2161
655	2.40775	2.50093	2.49513	2.4937	2.37144	2.29958	2.265	2.27904		655	2.28179	2.20058	2.18248	2.12337
656	2.32488	2.40704	2.40674	2.40144	2.2849	2.22054	2.19341	2.20296		656	2.18257	2.11716	2.09365	2.04089
657	2.239	2.31571	2.3202	2.31753	2.20544	2.14823	2.11473	2.11964		657	2.09284	2.02636	2.00384	1.95367
658	2.15687	2.23874	2.24117	2.23458	2.12827	2.07343	2.04036	2.04607		658	2.00538	1.94631	1.92485	1.8748
659	2.07468	2.15346	2.16149	2.15193	2.05353	1.9985	1.98133	1.97586		659	1.93124	1.87047	1.84827	1.80223
660	1.99515	2.0831	2.08327	2.07824	1.97733	1.93239	1.91738	1.9129		660	1.84957	1.78805	1.78576	1.72751
661	1.92413	2.01694	2.01164	2.00756	1.90712	1.86862	1.85458	1.85177		661	1.77365	1.71299	1.71769	1.65807
662	1.86055	1.94594	1.9454	1.93897	1.84019	1.80393	1.79543	1.78753		662	1.70285	1.64158	1.65787	1.58923
663	1.79482	1.87862	1.88044	1.87234	1.77621	1.74701	1.73995	1.72549		663	1.63626	1.58088	1.59116	1.52796
664	1.73307	1.81486	1.81702	1.81024	1.71682	1.68202	1.67442	1.66558		664	1.57127	1.51765	1.53157	1.46594
665	1.67453	1.75423	1.74853	1.75682	1.65744	1.62434	1.6179	1.61512		665	1.51528	1.46616	1.47089	1.41707
666	1.61877	1.69708	1.68804	1.69923	1.60117	1.57057	1.56475	1.56587		666	1.45802	1.40548	1.41145	1.36007
667	1.56407	1.64578	1.63681	1.64567	1.54866	1.52422	1.50794	1.51187		667	1.39639	1.34748	1.35312	1.30879
668	1.51556	1.59122	1.58173	1.59356	1.50393	1.47163	1.45881	1.45259		668	1.33656	1.29598	1.29792	1.26045
669	1.46843	1.5405	1.5351	1.54089	1.4587	1.42835	1.41116	1.40498		669	1.28824	1.2491	1.24747	1.21029
670	1.42525	1.49239	1.48256	1.4934	1.40824	1.38574	1.36326	1.36771		670	1.23655	1.2007	1.19336	1.16289
671	1.38317	1.43918	1.43455	1.44496	1.36311	1.33545	1.32105	1.32504		671	1.193	1.15461	1.14997	1.11973
672	1.34066	1.39208	1.39098	1.40027	1.32612	1.30068	1.27743	1.28522		672	1.14566	1.10763	1.10377	1.06761
673	1.29579	1.34701	1.35118	1.35143	1.28396	1.25378	1.23851	1.24612		673	1.099	1.05913	1.06802	1.02921
674	1.25089	1.30394	1.31303	1.3128	1.24716	1.21808	1.19839	1.20758		674	1.05732	1.01542	1.03013	0.991388
675	1.22409	1.26441	1.27531	1.26927	1.21371	1.17958	1.16568	1.17516		675	1.01872	0.977819	0.99933	0.95537
676	1.18951	1.22611	1.23562	1.22968	1.17979	1.13884	1.13242	1.14481		676	0.976027	0.939539	0.95513	0.917014
677	1.15688	1.18784	1.19737	1.19378	1.14573	1.09994	1.10282	1.11038		677	0.932755	0.897616	0.91681	0.881899
678	1.11744	1.1543	1.16268	1.15749	1.11284	1.06826	1.06565	1.07301		678	0.903316	0.863368	0.889822	0.85344
679	1.08429	1.12503	1.13266	1.12751	1.08091	1.03906	1.03632	1.04586		679	0.868241	0.826875	0.852436	0.819977
680	1.05017	1.09278	1.09822	1.09499	1.05213	1.01171	1.01187	1.0157		680	0.833166	0.790663	0.819033	0.78892
681	1.02579	1.06218	1.06905	1.06714	1.02852	0.986737	0.988651	0.995059		681	0.800767	0.765737	0.785624	0.757036
682	0.998685	1.03522	1.04184	1.03962	1.00254	0.964249	0.962609	0.968758		682	0.769978	0.738889	0.756099	0.725546
683	0.97093	1.00947	1.01473	1.01826	0.978019	0.940514	0.938259	0.948203		683	0.749518	0.710961	0.725154	0.706293
684	0.940895	0.981899	0.984783	0.991238	0.950589	0.920429	0.912811	0.922817		684	0.727626	0.68951	0.700866	0.682764
685	0.911168	0.952854	0.95836	0.970714	0.929352	0.902777	0.891343	0.9058		685	0.700575	0.669827	0.677524	0.658064
686	0.888899	0.93068	0.932262	0.944072	0.904683	0.881808	0.871458	0.884517		686	0.671781	0.6453	0.649136	0.636571
687	0.864956	0.905258	0.906555	0.92209	0.881794	0.857502	0.854952	0.86546		687	0.64492	0.62337	0.625224	0.611486
688	0.844648	0.882531	0.886969	0.904567	0.862802	0.839152	0.834668	0.848755		688	0.627776	0.60518	0.6112	0.598243
689	0.822055	0.85743	0.862454	0.880489	0.840694	0.81697	0.812223	0.825226		689	0.605574	0.580777	0.590568	0.575579
690	0.796674	0.832327	0.839412	0.860559	0.818508	0.797639	0.790295	0.803005		690	0.580652	0.561708	0.569269	0.55571
691	0.769979	0.809699	0.82271	0.837897	0.79793	0.777401	0.771496	0.783764		691	0.556923	0.539455	0.552219	0.536408
692	0.754665	0.788695	0.806711	0.816403	0.782687	0.762183	0.755394	0.767822		692	0.541535	0.517319	0.531965	0.518244
693	0.73825	0.767919	0.789711	0.793868	0.762908	0.738302	0.735692	0.750168		693	0.529092	0.502611	0.518009	0.505033
694	0.721766	0.752563	0.771239	0.774089	0.750802	0.720168	0.725423	0.737518		694	0.514085	0.487897	0.504995	0.49432
695	0.704278	0.732882	0.756115	0.750308	0.734345	0.704602	0.704937	0.717884		695	0.493001	0.468347	0.486855	0.47915
696	0.690482	0.721287	0.738137	0.735729	0.716419	0.689752	0.690912	0.705045		696	0.472011	0.444095	0.464536	0.461285
697	0.669994	0.702503	0.722779	0.719123	0.699985	0.672377	0.672484	0.690323		697	0.456646	0.427531	0.451928	0.447479
698	0.658731	0.691063	0.707832	0.703489	0.685083	0.653763	0.657125	0.677987		698	0.442092	0.415451	0.439745	0.434884
699	0.645459	0.673987	0.689499	0.686561	0.666873	0.641807	0.64323	0.664028		699	0.425713	0.399653	0.421329	0.423059
700	0.632247	0.659331	0.673555	0.676413	0.65625	0.629581	0.631894	0.654147		700	0.401033	0.377149	0.402916	0.402688

## Sheet: RIBOsensor_In vitro_Titration
XYDATA	Trial1_ECFP-RBP(A133.EYFP)_0.7uM in PBS_0.01uM ribose_433nm.jws	Trial1_ECFP-RBP(A133.EYFP)_0.7uM in PBS_0.1uM ribose_433nm.jws	Trial1_ECFP-RBP(A133.EYFP)_0.7uM in PBS_1uM ribose_433nm.jws	Trial1_ECFP-RBP(A133.EYFP)_0.7uM in PBS_10uM ribose_433nm.jws	Trial1_ECFP-RBP(A133.EYFP)_0.7uM in PBS_100uM ribose_433nm.jws	Trial1_ECFP-RBP(A133.EYFP)_0.7uM in PBS_1000uM ribose_433nm.jws	Trial1_ECFP-RBP(A133.EYFP)_0.7uM in PBS_10mM ribose_433nm.jws
476 nm	436.916	420.324	409.911	392.535	355.45	336.547	352.779
529 nm	393.741	386.038	383.068	406.126	469.521	492.167	513.263
XYDATA	Trial2_ECFP-RBP(A133.EYFP)_0.7uM in PBS_0.01uM ribose_433nm.jws	Trial2_ECFP-RBP(A133.EYFP)_0.7uM in PBS_0.1uM ribose_433nm.jws	Trial2_ECFP-RBP(A133.EYFP)_0.7uM in PBS_1uM ribose_433nm.jws	Trial2_ECFP-RBP(A133.EYFP)_0.7uM in PBS_10uM ribose_433nm.jws	Trial2_ECFP-RBP(A133.EYFP)_0.7uM in PBS_100uM ribose_433nm.jws	Trial2_ECFP-RBP(A133.EYFP)_0.7uM in PBS_1000uM ribose_433nm.jws	Trial2_ECFP-RBP(A133.EYFP)_0.7uM in PBS_10000uM ribose_433nm.jws
476 nm	485.397	449.785	433.155	425.504	383.394	357.174	387.511
529 nm	412.847	394.437	391.977	420.394	473.404	482.764	516.817
XYDATA	Trial3_ECFP-RBP(A133.EYFP)_0.7uM in PBS_0.01uM ribose_433nm.jws	Trial3_ECFP-RBP(A133.EYFP)_0.7uM in PBS_0.1uM ribose_433nm.jws	Trial3_ECFP-RBP(A133.EYFP)_0.7uM in PBS_1uM ribose_433nm.jws	Trial3_ECFP-RBP(A133.EYFP)_0.7uM in PBS_10uM ribose_433nm.jws	Trial3_ECFP-RBP(A133.EYFP)_0.7uM in PBS_100uM ribose_433nm.jws	Trial3_ECFP-RBP(A133.EYFP)_0.7uM in PBS_1000uM ribose_433nm.jws	Trial3_ECFP-RBP(A133.EYFP)_0.7uM in PBS_10000uM ribose_433nm.jws
476 nm	496.837	458.447	451.153	426.72	392.133	371.421	420.142
529 nm	392.778	381.348	387.999	404.14	453.834	471.122	495.424
XYDATA	Trial4_ECFP-RBP(A133.EYFP)_0.7uM in PBS_0.01uM ribose_433nm.jws	Trial4_ECFP-RBP(A133.EYFP)_0.7uM in PBS_0.1uM ribose_433nm.jws	Trial4_ECFP-RBP(A133.EYFP)_0.7uM in PBS_1uM ribose_433nm.jws	Trial4_ECFP-RBP(A133.EYFP)_0.7uM in PBS_10uM ribose_433nm.jws	Trial4_ECFP-RBP(A133.EYFP)_0.7uM in PBS_100uM ribose_433nm.jws	Trial4_ECFP-RBP(A133.EYFP)_0.7uM in PBS_1000uM ribose_433nm.jws	Trial4_ECFP-RBP(A133.EYFP)_0.7uM in PBS_10000uM ribose_433nm.jws
476 nm	441.631	438.69	431.886	423.013	378.496	366.441	357.292
529 nm	353.624	354.928	356.4	380.233	429.402	453.456	452.696
XYDATA	Trial5_ECFP-RBP(A133.EYFP)_0.7uM in PBS_0.01uM ribose_433nm.jws	Trial5_ECFP-RBP(A133.EYFP)_0.7uM in PBS_0.1uM ribose_433nm.jws	Trial5_ECFP-RBP(A133.EYFP)_0.7uM in PBS_1uM ribose_433nm.jws	Trial5_ECFP-RBP(A133.EYFP)_0.7uM in PBS_10uM ribose_433nm.jws	Trial5_ECFP-RBP(A133.EYFP)_0.7uM in PBS_100uM ribose_433nm.jws	Trial5_ECFP-RBP(A133.EYFP)_0.7uM in PBS_1000uM ribose_433nm.jws	Trial5_ECFP-RBP(A133.EYFP)_0.7uM in PBS_10000uM ribose_433nm.jws
476 nm	430.157	415.962	419.063	406.388	368.183	355.483	358.165
529 nm	346.483	338.011	345.231	368.878	419.182	444.701	451.233
XYDATA	Trial6_ECFP-RBP(A133.EYFP)_0.7uM in PBS_0.01uM ribose_433nm.jws	Trial6_ECFP-RBP(A133.EYFP)_0.7uM in PBS_0.1uM ribose_433nm.jws	Trial6_ECFP-RBP(A133.EYFP)_0.7uM in PBS_1uM ribose_433nm.jws	Trial6_ECFP-RBP(A133.EYFP)_0.7uM in PBS_10uM ribose_433nm.jws	Trial6_ECFP-RBP(A133.EYFP)_0.7uM in PBS_100uM ribose_433nm.jws	Trial6_ECFP-RBP(A133.EYFP)_0.7uM in PBS_1000uM ribose_433nm.jws	Trial6_ECFP-RBP(A133.EYFP)_0.7uM in PBS_10000uM ribose_433nm.jws
476 nm	425.329	417.539	414.862	402.289	364.67	353.319	351.358
529 nm	343.845	341.337	344.442	366.445	418.49	444.202	443.59
	I1: 476 nm								R1/2
Ligand Conc. (uM)	Trial1	Trial2	Trial3	Trial4	Trial5	Trial6		Ligand Conc. (uM)	Trial1	Trial2	Trial3	Trial4	Trial5	Trial6
0.01	436.916	485.397	496.837	441.631	430.157	425.329		0.01	1.10965	1.17573	1.26493	1.24887	1.2415	1.23698
0.1	420.324	449.785	458.447	438.69	415.962	417.539		0.1	1.08882	1.14032	1.20217	1.236	1.23062	1.22325
1	409.911	433.155	451.153	431.886	419.063	414.862		1	1.07007	1.10505	1.16277	1.2118	1.21386	1.20445
10	392.535	425.504	426.72	423.013	406.388	402.289		10	0.966535	1.01216	1.05587	1.11251	1.10169	1.09782
100	355.45	383.394	392.133	378.496	368.183	364.67		100	0.757048	0.809866	0.864045	0.881449	0.878337	0.871395
1000	336.547	357.174	371.421	366.441	355.483	353.319		1000	0.683807	0.739852	0.788375	0.808107	0.799375	0.795402
10000	352.779	387.511	420.142	357.292	358.165	351.358		10000	0.687326	0.749803	0.848045	0.789254	0.793747	0.792078
	I2: 529 nm								R2/1
Ligand Conc. (uM)	Trial1	Trial2	Trial3	Trial4	Trial5	Trial6		Ligand Conc. (uM)	Trial1	Trial2	Trial3	Trial4	Trial5	Trial6
0.01	393.741	412.847	392.778	353.624	346.483	343.845		0.01	0.901182	0.850535	0.790557	0.800723	0.80548	0.808421
0.1	386.038	394.437	381.348	354.928	338.011	341.337		0.1	0.91843	0.876946	0.831826	0.809063	0.812601	0.817497
1	383.068	391.977	387.999	356.4	345.231	344.442		1	0.934515	0.904935	0.860016	0.825218	0.823816	0.830257
10	406.126	420.394	404.14	380.233	368.878	366.445		10	1.03462	0.987991	0.947085	0.898868	0.907699	0.9109
100	469.521	473.404	453.834	429.402	419.182	418.49		100	1.32092	1.23477	1.15735	1.1345	1.13852	1.14759
1000	492.167	482.764	471.122	453.456	444.701	444.202		1000	1.4624	1.35162	1.26843	1.23746	1.25098	1.25723
10000	513.263	516.817	495.424	452.696	451.233	443.59		10000	1.45491	1.33368	1.17918	1.26702	1.25985	1.2625
									I1 (avg)	I2 (avg)	R1/2		R2/1
								Ligand Conc. (uM)	I (476 nm)	I (529 nm)	avg	stdev.p	avg	stdev.p
								0.01	452.711	373.886	1.21294	0.0539136	0.82615	0.0384695
								0.1	433.458	366.017	1.18686	0.054262	0.844394	0.0401691
								1	426.672	368.186	1.16133	0.0557719	0.863126	0.042655
								10	412.741	391.036	1.05776	0.0531302	0.947861	0.0491903
								100	373.721	443.972	0.84369	0.0455684	1.18894	0.0679882
								1000	356.731	464.735	0.769153	0.04403	1.30469	0.0796326
								10000	371.208	478.837	0.776709	0.0491359	1.29286	0.0851761
								I(1u)	452.711
								I(1b)	371.208
								I(2u)	373.886
								I(2b)	478.837

## Sheet: RIBOsensor_In vitro_Selectivity
	Trial1_ECFP-RBP(A133.EYFP)_0.7uM in PBS_NO ribose_433nm.jws	Trial2_ECFP-RBP(A133.EYFP)_0.7uM in PBS_NO ribose_433nm.jws	Trial3_ECFP-RBP(A133.EYFP)_0.7uM in PBS_NO ribose_433nm.jws	Trial1_ECFP-RBP(A133.EYFP)_0.7uM in PBS_10mM ribose_433nm.jws	Trial2_ECFP-RBP(A133.EYFP)_0.7uM in PBS_10mM ribose_433nm.jws	Trial3_ECFP-RBP(A133.EYFP)_0.7uM in PBS_10mM ribose_433nm.jws
476 nm	197.825	206.038	201.975	176.341	166.467	168.56
529 nm	184.685	191.025	190.144	263.54	254.075	253.679
	Trial1_ECFP-RBP(A133.EYFP)_0.7uM in PBS_10mM glucose_433nm.jws	Trial2_ECFP-RBP(A133.EYFP)_0.7uM in PBS_10mM glucose_433nm.jws	Trial3_ECFP-RBP(A133.EYFP)_0.7uM in PBS_10mM glucose_433nm.jws	Trial1_ECFP-RBP(A133.EYFP)_0.7uM in PBS_10mM glucose and 10mM ribose_433nm.jws	Trial2_ECFP-RBP(A133.EYFP)_0.7uM in PBS_10mM glucose and 10mM ribose_433nm.jws	Trial3_ECFP-RBP(A133.EYFP)_0.7uM in PBS_10mM glucose and 10mM ribose_433nm.jws
476 nm	202.68	199.466	197.7	163.185	164.278	161.086
529 nm	187.76	184.846	183.222	247.255	248.446	242.408
	Trial1_ECFP-RBP(A133.EYFP)_0.7uM in PBS_10mM R5P_433nm.jws	Trial2_ECFP-RBP(A133.EYFP)_0.7uM in PBS_10mM R5P_433nm.jws	Trial3_ECFP-RBP(A133.EYFP)_0.7uM in PBS_10mM R5P_433nm.jws	Trial1_ECFP-RBP(A133.EYFP)_0.7uM in PBS_10mM R5P and 10mM ribose_433nm.jws	Trial2_ECFP-RBP(A133.EYFP)_0.7uM in PBS_10mM R5P and 10mM ribose_433nm.jws	Trial3_ECFP-RBP(A133.EYFP)_0.7uM in PBS_10mM R5P and 10mM ribose_433nm.jws
476 nm	210.051	198.464	201.386	166.761	165.979	167.483
529 nm	194.061	186.578	189.479	236.625	236.221	237.069
	Trial1_ECFP-RBP(A133.EYFP)_0.7uM in PBS_10mM R1P_433nm.jws	Trial2_ECFP-RBP(A133.EYFP)_0.7uM in PBS_10mM R1P_433nm.jws	Trial3_ECFP-RBP(A133.EYFP)_0.7uM in PBS_10mM R1P_433nm.jws	Trial1_ECFP-RBP(A133.EYFP)_0.7uM in PBS_10mM R1P and 10mM ribose_433nm.jws	Trial2_ECFP-RBP(A133.EYFP)_0.7uM in PBS_10mM R1P and 10mM ribose_433nm.jws	Trial3_ECFP-RBP(A133.EYFP)_0.7uM in PBS_10mM R1P and 10mM ribose_433nm.jws
476 nm	214.678	201.172	198.121	160.498	157.842	159.089
529 nm	194.959	185.98	185.24	236.65	232.7	233.898
	Trial1_ECFP-RBP(A133.EYFP)_0.7uM in PBS_10mM ribitol_433nm.jws	Trial2_ECFP-RBP(A133.EYFP)_0.7uM in PBS_10mM ribitol_433nm.jws	Trial3_ECFP-RBP(A133.EYFP)_0.7uM in PBS_10mM ribitol_433nm.jws	Trial1_ECFP-RBP(A133.EYFP)_0.7uM in PBS_10mM ribitol and 10mM ribose_433nm.jws	Trial2_ECFP-RBP(A133.EYFP)_0.7uM in PBS_10mM ribitol and 10mM ribose_433nm.jws	Trial3_ECFP-RBP(A133.EYFP)_0.7uM in PBS_10mM ribitol and 10mM ribose_433nm.jws
476 nm	205.55	194.217	195.684	154.151	157.168	153.018
529 nm	189.688	181.764	181.156	230.985	230.866	229.114
	Trial1_ECFP-RBP(A133.EYFP)_0.7uM in PBS_10mM allose_433nm.jws	Trial2_ECFP-RBP(A133.EYFP)_0.7uM in PBS_10mM allose_433nm.jws	Trial3_ECFP-RBP(A133.EYFP)_0.7uM in PBS_10mM allose_433nm.jws	Trial1_ECFP-RBP(A133.EYFP)_0.7uM in PBS_10mM allose and 10mM ribose_433nm.jws	Trial2_ECFP-RBP(A133.EYFP)_0.7uM in PBS_10mM allose and 10mM ribose_433nm.jws	Trial3_ECFP-RBP(A133.EYFP)_0.7uM in PBS_10mM allose and 10mM ribose_433nm.jws
476 nm	187.808	188.785	187.669	158.887	159.252	159.627
529 nm	194.391	194.041	192.39	239.566	238.51	239.631
I(476 nm)
PBS	10 mM ribose	10 mM Glucose	10 mM glucose + 10 mM ribose	10 mM R5P	10 mM R5P + 10 mM ribose	10 mM R1P	10 mM R1P + 10 mM ribose	10 mM ribitol	10 mM ribitol + 10 mM ribose	10 mM allose	10 mM allose + 10 mM ribose
197.825	176.341	202.68	163.185	210.051	166.761	214.678	160.498	205.55	154.151	187.808	158.887
206.038	166.467	199.466	164.278	198.464	165.979	201.172	157.842	194.217	157.168	188.785	159.252
201.975	168.56	197.7	161.086	201.386	167.483	198.121	159.089	195.684	153.018	187.669	159.627
I(529 nm)
PBS	10 mM ribose	10 mM Glucose	10 mM glucose + 10 mM ribose	10 mM R5P	10 mM R5P + 10 mM ribose	10 mM R1P	10 mM R1P + 10 mM ribose	10 mM ribitol	10 mM ribitol + 10 mM ribose	10 mM allose	10 mM allose + 10 mM ribose
184.685	263.54	187.76	247.255	194.061	236.625	194.959	236.65	189.688	230.985	194.391	239.566
191.025	254.075	184.846	248.446	186.578	236.221	185.98	232.7	181.764	230.866	194.041	238.51
190.144	253.679	183.222	242.408	189.479	237.069	185.24	233.898	181.156	229.114	192.39	239.631
I529/I476
PBS	10 mM ribose	10 mM Glucose	10 mM glucose + 10 mM ribose	10 mM R5P	10 mM R5P + 10 mM ribose	10 mM R1P	10 mM R1P + 10 mM ribose	10 mM ribitol	10 mM ribitol + 10 mM ribose	10 mM allose	10 mM allose + 10 mM ribose
0.933578	1.49449	0.926386	1.51518	0.923876	1.41895	0.908146	1.47447	0.922831	1.49843	1.03505	1.50778
0.927135	1.52628	0.926704	1.51235	0.94011	1.4232	0.924483	1.47426	0.935881	1.46891	1.02784	1.49769
0.941423	1.50498	0.926768	1.50484	0.940875	1.41548	0.934984	1.47023	0.925758	1.4973	1.02516	1.50119
avg
0.934045
normalized I529/I476 to PBS
PBS	10 mM ribose	10 mM Glucose	10 mM glucose + 10 mM ribose	10 mM R5P	10 mM R5P + 10 mM ribose	10 mM R1P	10 mM R1P + 10 mM ribose	10 mM ribitol	10 mM ribitol + 10 mM ribose	10 mM allose	10 mM allose + 10 mM ribose
0.999548	1.6001	0.991848	1.62225	0.98916	1.51922	0.972319	1.57867	0.988042	1.60432	1.10819	1.61432
0.99265	1.63413	0.992189	1.61922	1.00654	1.52377	0.98981	1.57844	1.00201	1.57271	1.10047	1.60352
1.00795	1.61132	0.992257	1.61117	1.00736	1.5155	1.00105	1.57413	0.991175	1.60311	1.0976	1.60727

## Sheet: RIBOsensor Binding Kinetics
In vitro
	Trial1_ECFP-RBP(A133.EYFP)_0.7uM in PBS_no ribose_433nm.jws	Trial2_ECFP-RBP(A133.EYFP)_0.7uM in PBS_no ribose_433nm.jws	Trial3_ECFP-RBP(A133.EYFP)_0.7uM in PBS_no ribose_433nm.jws	Trial1_ECFP-RBP(A133.EYFP)_0.7uM in PBS_1mM ribose-long incubated_433nm.jws	Trial2_ECFP-RBP(A133.EYFP)_0.7uM in PBS_1mM ribose-long incubated_433nm.jws	Trial3_ECFP-RBP(A133.EYFP)_0.7uM in PBS_1mM ribose-long incubated_433nm.jws	Trial1_ECFP-RBP(A133.EYFP)_0.7uM in PBS_1mM ribose-just mixed_433nm.jws	Trial2_ECFP-RBP(A133.EYFP)_0.7uM in PBS_1mM ribose-just mixed_433nm.jws	Trial3_ECFP-RBP(A133.EYFP)_0.7uM in PBS_1mM ribose-just mixed_433nm.jws	Trial4_ECFP-RBP(A133.EYFP)_0.7uM in PBS_1mM ribose-just mixed_433nm.jws
476 nm	336.374	350.068	342.572	289.91	284.724	272.211	274.7	279.608	268.644	274.009
529 nm	314.153	324.652	317.785	424.845	429.069	417.332	393.385	418.281	403.169	408.876
I(476 nm)
PBS	long incubated - 1 mM ribose	just mixed - 1 mM ribose
336.374	289.91	274.7
350.068	284.724	279.608
342.572	272.211	268.644
		274.009
I(529 nm)
PBS	long incubated - 1 mM ribose	just mixed - 1 mM ribose
314.153	424.845	393.385
324.652	429.069	418.281
317.785	417.332	403.169
		408.876
I529/I476
PBS	long incubated - 1 mM ribose	just mixed - 1 mM ribose
0.93394	1.46544	1.43205
0.927397	1.50696	1.49596
0.927644	1.53312	1.50076
		1.4922
avg
0.92966
normalized I529/I476 to PBS
PBS	long incubated - 1 mM ribose	just mixed - 1 mM ribose
1.00424	1.57574	1.53984
0.997201	1.62039	1.60855
0.997467	1.64852	1.61372
		1.60452
in lysate
	Trial2_HEK293T_2FBS-5mMGlucose_soluble fraction_PBS_No Ribose_433nm.jws	Trial3_HEK293T_2FBS-5mMGlucose_soluble fraction_PBS_No Ribose_433nm.jws	Trial1_HEK293T_2FBS-5mMGlucose_soluble fraction_PBS_No Ribose_433nm.jws	Trial1_HEK293T_2FBS-5mMGlucose_soluble fraction_PBS_50mM Ribose-long incubated_433nm.jws	Trial2_HEK293T_2FBS-5mMGlucose_soluble fraction_PBS_50mM Ribose-long incubated_433nm.jws	Trial3_HEK293T_2FBS-5mMGlucose_soluble fraction_PBS_50mM Ribose-long incubated_433nm.jws	Trial4_HEK293T_2FBS-5mMGlucose_soluble fraction_PBS_50mM Ribose-long incubated_433nm.jws	Trial1_HEK293T_2FBS-5mMGlucose_soluble fraction_PBS_50mM Ribose-just mixed_433nm.jws	Trial2_HEK293T_2FBS-5mMGlucose_soluble fraction_PBS_50mM Ribose-just mixed_433nm.jws	Trial3_HEK293T_2FBS-5mMGlucose_soluble fraction_PBS_50mM Ribose-just mixed_433nm.jws	Trial4_HEK293T_2FBS-5mMGlucose_soluble fraction_PBS_50mM Ribose-just mixed_433nm.jws
476 nm	358.004	352.327	362.613	286.245	285.353	282.732	258.679	303.874	287.755	286.495	282.184
529 nm	309.142	302.959	314.803	359.911	356.137	350.705	329.467	383.381	372.215	367.451	360.468
I(476 nm)
PBS	long incubated -50 mM ribose	just mixed - 50 mM ribose
358.004	286.245	303.874
352.327	285.353	287.755
362.613	282.732	286.495
	258.679	282.184
I(529 nm)
PBS	long incubated -50 mM ribose	just mixed - 50 mM ribose
309.142	359.911	383.381
302.959	356.137	372.215
314.803	350.705	367.451
	329.467	360.468
I529/I476
PBS	long incubated -50 mM ribose	just mixed - 50 mM ribose
0.863515	1.25735	1.26164
0.85988	1.24806	1.29351
0.868151	1.24041	1.28257
	1.27365	1.27742
avg
0.863849
normalized I529/I476 to PBS
PBS	long incubated -50 mM ribose	just mixed - 50 mM ribose
0.999439	1.45527	1.46024
0.995232	1.44451	1.49712
1.0048	1.43567	1.48446
	1.47413	1.4785

## Sheet: RIBOsensor_In situ_Titration
Trial1	max FRET	min FRET	ΔFRET (in situ)		Trial2	max FRET	min FRET	ΔFRET (in situ)		Trial3	max FRET	min FRET	ΔFRET (in situ)		Trial4	max FRET	min FRET	ΔFRET (in situ)
2%FBS_5mM Glucose					2%FBS_5mM Glucose					2%FBS_5mM Glucose					2%FBS_5mM Glucose
0	2.08	1.13	0.96		0	1.97	1.14	0.85		0	1.91	1.12	0.78		0	1.92	1.16	0.76
1	2	1.11	0.88		1	1.92	1.14	0.8		1	1.96	1.16	0.83		1	1.94	1.19	0.78
10	1.95	1.14	0.83		10	1.97	1.12	0.85		10	1.89	1.14	0.76		10	1.95	1.16	0.79
50	1.94	1.16	0.82		50	2.02	1.12	0.9		50	1.89	1.14	0.76		50	1.94	1.16	0.78
100	2	1.13	0.88		100	2.02	1.14	0.9		100	1.94	1.14	0.81		100	1.99	1.16	0.83
500	2.2	1.1	1.08		500	2.25	1.14	1.13		500	2.19	1.12	1.06		500	2.17	1.14	1.01
1000	2.31	1.12	1.19		1000	2.19	1.12	1.07		1000	2.27	1.14	1.14		1000	2.3	1.19	1.14
10000	2.52	1.11	1.4		10000	2.34	1.06	1.22		10000	2.42	1.12	1.29		10000	2.47	1.13	1.31
50000	2.45	1.1	1.33		50000	2.39	1.12	1.27		50000	2.5	1.12	1.37		50000	2.52	1.15	1.36
100000	2.47	1.1	1.35		100000	2.42	1.09	1.3		100000	2.5	1.1	1.37		100000	2.51	1.17	1.35
		Avg					Avg					Avg					Avg
		1.12					1.119					1.13					1.161
Conc. (uM)	ΔFRET (in situ)				Avg	STDEV.P
0.01	0.96	0.85	0.78	0.76	0.8375	0.0782224
1	0.88	0.8	0.83	0.78	0.8225	0.0376663
10	0.83	0.85	0.76	0.79	0.8075	0.0349106
50	0.82	0.9	0.76	0.78	0.815	0.053619
100	0.88	0.9	0.81	0.83	0.855	0.0364005
500	1.08	1.13	1.06	1.01	1.07	0.0430116
1000	1.19	1.07	1.14	1.14	1.135	0.04272
10000	1.4	1.22	1.29	1.31	1.305	0.0642262
50000	1.33	1.27	1.37	1.36	1.3325	0.0389711
100000	1.35	1.3	1.37	1.35	1.3425	0.0258602

## Sheet: RIBOsensor_In situ_Selectivity
	max FRET	min FRET	ΔFRET (in situ)
2%FBS_5mM Glucose
No ribose	1.94	1.19	0.75
No ribose	1.97	1.19	0.78
No ribose	1.89	1.19	0.7
No ribose	1.87	1.21	0.68
10 mM Ribose	2.44	1.19	1.25
10 mM Ribose	2.44	1.17	1.25
10 mM Ribose	2.48	1.17	1.29
10 mM Ribose	2.44	1.21	1.25
		1.19
	max FRET	min FRET	ΔFRET (in situ)
2%FBS_5mM Glucose
10 mM R5P	1.89	1.21	0.7
10 mM R5P	1.92	1.19	0.73
10 mM R5P	1.91	1.19	0.72
10 mM R5P	1.94	1.21	0.75
10 mM R5P + 10 mM Ribose	2.49	1.17	1.3
10 mM R5P + 10 mM Ribose	2.48	1.19	1.29
10 mM R5P + 10 mM Ribose	2.47	1.16	1.28
10 mM R5P + 10 mM Ribose	2.44	1.17	1.25
10 mM R5P + 10 mM Ribose	2.47	1.19	1.28
		1.18667
	max FRET	min FRET	ΔFRET (in situ)
2%FBS_5mM Glucose
10 mM Glucose	1.94	1.16	0.79
10 mM Glucose	1.99	1.16	0.84
10 mM Glucose	1.89	1.16	0.74
10 mM Glucose + 10 mM Ribose	2.52	1.12	1.37
10 mM Glucose + 10 mM Ribose	2.47	1.14	1.32
10 mM Glucose + 10 mM Ribose	2.48	1.14	1.33
		1.14667
